1 **From the formation of embryonic appendages to the color of wings:**  
2 **Conserved and novel roles of *aristales1* in butterfly development**

3 Erick X. Bayala<sup>1,2</sup>, Nicholas VanKuren<sup>1</sup>, Darli Massardo<sup>1</sup>, Marcus Kronforst<sup>1,2</sup>

4 **Affiliations:**

5 <sup>1</sup> Department of Ecology & Evolution, University of Chicago, Chicago, IL 60637

6 <sup>2</sup> Department of Organismal Biology and Anatomy, University of Chicago, Chicago, IL  
7 60637

8 **Corresponding author:** Erick X. Bayala, email: [ebayala@uchicago.edu](mailto:ebayala@uchicago.edu)

9 **Abstract**

10 Highly diverse butterfly wing patterns have emerged as a powerful system for  
11 understanding the genetic basis of phenotypic variation. While the genetic basis of this  
12 pattern variation is being clarified, the precise developmental pathways linking genotype  
13 to phenotype are not well understood. The gene *aristales*, which plays a role in  
14 appendage patterning and extension, has been duplicated in Lepidoptera. One copy,  
15 *aristales1*, has been shown to control a white/yellow color switch in the butterfly  
16 *Heliconius cydno*, suggesting a novel function associated with color patterning and  
17 pigmentation. Here we investigate the developmental basis of *a1* in embryos, larvae  
18 and pupae using new antibodies, CRISPR/Cas9, RNAi, qPCR assays of downstream  
19 targets and pharmacological manipulation of an upstream activator. We find that Al1 is  
20 expressed at the distal tips of developing embryonic appendages consistent with its  
21 ancestral role. In developing wings, we observe Al1 accumulation within developing

22 scale cells of white *H. cydno* during early pupation while yellow scale cells exhibit little  
23 AI1 at this timepoint. Reduced AI1 expression is also associated with yellow scale  
24 development in *a11* knockouts and knockdowns. We also find that AI1 expression  
25 appears to downregulate the enzyme Cinnabar and other genes that synthesize and  
26 transport the yellow pigment, 3-Hydroxykynurenine (3-OHK). Finally, we provide  
27 evidence that AI1 activation is under the control of Wnt signaling. We propose a model  
28 in which high levels of AI1 during early pupation, which are mediated by Wnt, are  
29 important for melanic pigmentation and specifying white portions of the wing while  
30 reduced levels of AI1 during early pupation promote upregulation of proteins needed to  
31 move and synthesize 3-OHK, promoting yellow pigmentation. In addition, we discuss  
32 how the ancestral role of *aristalless* in appendage extension may be relevant in  
33 understanding the cellular mechanism behind color patterning in the context of the  
34 heterochrony hypothesis.

## 35 **Introduction**

36 The diversity and complexity of butterfly color patterns is striking. What is even  
37 more impressive is that this color pattern diversity within butterflies is often controlled by  
38 a small number of genes (Deshmukh, et al., 2017). Despite the importance of these  
39 color patterning genes for the life history and ecology of butterflies, we know very little  
40 about how similar or different these genes function during wing color pattern  
41 development. *Heliconius* butterflies are a great system to address this issue. In this  
42 genus, a handful of genes control the evolution and diversity of multiple color patterns  
43 (Kronforst & Papa, 2015; Van Belleghem, et al., 2017). One example is the signaling  
44 ligand *wntA*, which is expressed early within the larval wing imaginal discs and specifies

45 future black patterns on the adult wing (Martin, et al., 2012, **Figure 1**). Another example  
46 is the transcription factor *optix*, which controls red color patterns across *Heliconius* by  
47 localizing within the nucleus of scale building cells during mid pupation (Reed, et al.,  
48 2011; Martin, et al., 2014, **Figure 1**). One last example is the gene *cortex*, which is a  
49 cell cycle regulator involved in the specification of melanic elements of the wing  
50 (Nadeau, et al., 2016). Despite major developmental differences and although *cortex*  
51 knock-outs may have more widespread effects on scale development (Livraghi, et al.,  
52 2021), all three of these genes have expression patterns that spatially prefigure future  
53 adult black and red color pattern elements at different stages of wing development. In  
54 addition to black and red patterns, multiple *Heliconius* species vary in color on light  
55 portions of their wings, specifically whether these scales are white (unpigmented) or  
56 yellow (containing the hemolymph derived pigment 3-hydroxykynurenine [3-OHK];  
57 Gilbert, et al., 1988). Recently, the genetic switch between white and yellow scale fates  
58 in *Heliconius cydno*, which has historically been referred to as the *K* locus (Kronforst, et  
59 al., 2006; Chamberlain, et al., 2009), was traced back to the gene *aristaless1* (*al1*) in  
60 *Heliconius cydno* (Westerman, et al., 2018). However, we know little about the  
61 developmental basis of *al1* color switching, including how and when during development  
62 this gene controls the decision between white and yellow color phenotypes.  
63 Furthermore, we have no information about how the developmental biology of *al1*  
64 compares to *optix*, *wntA*, and *cortex* and if any general developmental trends, like the  
65 spatial prefiguring often described for these other genes, will emerge in the context of  
66 *Heliconius* color patterning.

67           Here we investigate how *a1* specifies white and yellow wing coloration by  
68 studying the timing of *a1* transcription and protein localization in developing wings of  
69 the butterfly *Heliconius cydno*, a species with polymorphic wing coloration. The  
70 homeobox transcription factor *aristaless1* is one of two paralogs stemming from a gene  
71 duplication event that occurred at the base of Lepidoptera (Martin and Reed, 2010).  
72 Much of what we know about the single-copy ancestral *aristaless* (*al*) comes from work  
73 in *Drosophila* and shows that it is often associated with the extension and patterning of  
74 appendages. (Schneitz, et al., 1993). Gene expression studies in flies (Campbell &  
75 Tomlinson, 1988; Schneitz, et al., 1993) have shown that *al* accumulates along the  
76 distal edges of extending structures such as leg, wing, and antennae during different  
77 developmental stages. Furthermore, knockouts of *al* in flies (Schneitz, et al., 1993) often  
78 result in malformed or missing distal elements of appendages. These observations in  
79 *Drosophila* have been reinforced in other insects like beetles (Moczek, 2005) and  
80 crickets (Beermann and Schroder, 2004; Miyawaki, et al., 2002). There is also some  
81 information on the developmental role of *a1* in Lepidoptera. For instance, in the moth  
82 *Bombyx mori*, *a1* has been shown to be crucial for the extension and branching  
83 patterns of antennae (Ando, et al., 2018). In this example, *a1* expression and protein  
84 localization were observed within all of the extending branches of the antennae (Ando,  
85 et al 2018). In addition, in some nymphalid butterflies *a2* has been shown to play a role  
86 in specifying melanic discal (black patches in the middle of the wing) color pattern  
87 elements on the wing (Martin and Reed, 2010). In summary, *al* has been described on  
88 multiple occasions and across several organisms as a key regulator of developmental  
89 processes. Previous descriptions of *a1*'s role in the extension of appendages and

90 perhaps wing patterning beg the question of how this gene mediates the developmental  
91 decision between white and yellow wing patterns in *Heliconius* butterflies.

92 Here we analyze CRISPR/Cas9 knockouts in adult wings to describe the multiple  
93 effects that *a11* has on color patterning in *Heliconius*. We also use a combination of  
94 staining techniques to describe AI1 subcellular localization first in embryos appendages,  
95 and then across the development of the wing in order to determine when and where AI1  
96 may be controlling the decision between white and yellow color patterns. Then, we  
97 combine knockout and knockdown approaches with our AI1 staining to provide  
98 functional evidence for how AI1 subcellular localization relates to the final specification  
99 of color pattern. Finally, we perform quantitative PCR (qPCR) analyses to determine  
100 possible downstream genes under the control of AI1 and employ a pharmacological  
101 agent to dissect the role of an upstream pathway in the regulation of AI1. Our results  
102 reveal how *a11* controls white and yellow color patterns formation (specification to  
103 pigmentation) in *Heliconius* and help explain the developmental mechanisms leading to  
104 a fully pigmented *Heliconius* wing.

## 105 **Results**

106 ***a11* knockouts switch white scales to yellow and black scales to brown but have**  
107 **no effect on yellow scales.**

108 Previous work used CRISPR/Cas9 knockouts to functionally test the involvement  
109 of *a11* in the switch between white and yellow wing color in *Heliconius cydno*  
110 (Westerman, et al., 2018). In these experiments, genetically white *H. cydno* with an *a11*  
111 knockout exhibited a switch of white scales to yellow scales (Westerman, et al., 2018).

112 To study the developmental role of *a11* we generated new CRISPR/Cas9 knockouts and  
113 recovered both the previously described as well as novel effects. As previously  
114 described, *a11* knockout clones within the white band of a genetically white *H. cydno*  
115 switched white scales to yellow (**Figure 2A**). However, careful observation of these  
116 yellow clones in white *H. cydno* revealed that when these clones expanded over the  
117 melanic regions of the wing, black scales became brown (**Figure 2B**). Previous work  
118 reported that Al1 seemed to be acting as a repressor of the yellow fate (Westerman, et  
119 al., 2018). Based on this repressor activity we hypothesized that *a11* knockout clones in  
120 genetically yellow *H. cydno* would have no effect on the yellow portions of the wing. In  
121 favor of this hypothesis we did not see any effects on the yellow parts of the wing, yet  
122 interestingly, similar to white butterflies, clones within the melanic regions of yellow  
123 butterflies also exhibited a switch from black to brown scales (**Figure 2B**).

124 These results confirm the importance of *a11* for the development of white wing  
125 coloration. If *a11* is knocked out, scales then switch to the yellow fate. However, the  
126 newly described *a11* knockout effects in melanic regions suggest a general role of *a11* in  
127 scale development across the entire wing, not just in the white/yellow band. Based on  
128 the widespread effect observed in white *H. cydno*, we hypothesized that *a11* expression  
129 may be important for scale development across the entire wing except for the yellow  
130 band of yellow *H. cydno*. We tested this hypothesis by analyzing *a11* expression and  
131 protein localization across multiple developmental stages for both yellow and white *H.*  
132 *cydno* butterflies.

133 **Al1 staining in embryos recapitulates the previous known role of Al with respect**  
134 **to proper appendage extension.**

135 Most of the previous AI1 work in nymphalid butterflies was done using the DP311  
136 antibody, which is known to stain homeodomain transcription factors like AI1. However,  
137 this reagent is known to cross-react with similar proteins like the paralog *Aristaless2*  
138 (Martin and Reed, 2010). In order to avoid this, we developed specific antibodies  
139 against *H. cydno* AI1 epitopes to determine the protein subcellular localization and  
140 pattern of expression in wings (**Figure S2**).

141 Before looking into AI1 expression pattern in wings, we tested our antibody  
142 specificity in *Heliconius cydno* embryos where we analyzed its relationship relative to  
143 the ancestral AI function in appendages. We also aimed to provide expectations of its  
144 subcellular localization within appendages as a point of comparison for wings. Similar to  
145 what has been reported in other insect systems (Campbell & Tomlinson, 1988;  
146 Schneitz, et al., 1993; Miyawaki, et al., 2002; Beermann and Schroder, 2004) for AI, we  
147 observed AI1 localized on the distal tip of appendages extending out of the primary  
148 body plan (**Figure 3A**). We observed accumulation within the cellular buds giving rise to  
149 the mouthparts within the head region (**Figure 3B**). In addition, we observed a clear  
150 accumulation of AI1 within the distal tips of the thoracic (**Figure 3C**), abdominal (**Figure**  
151 **3D**), and anal prolegs. We also observed accumulation on the dorsal side of the embryo  
152 which has not previously been described in other systems. Surprisingly higher  
153 magnification revealed no apparent co-localization with the nucleus of cells at the distal  
154 tips (**Figure 3B-D**). To further elucidate our antibody specificity and determine if AI1  
155 expression was causally related to appendage extension, we stained CRISPR AI1  
156 knockout embryos. We observed sections of the embryos depleted for AI1, as expected  
157 from a CRISPR knockout (**Figure 3E-G**). In addition, areas depleted of AI1 exhibited

158 elongation defects when compared to the same appendages within the embryos that  
159 had normal levels of AI1. In addition to confirming a role for AI1 in appendage extension  
160 in *Heliconius* embryos, these data also provide evidence for the specificity of our newly  
161 developed antibodies, allowing us to further probe the role of AI1 in wing color  
162 patterning

163 **AI1 accumulates in future white and black scale cell precursors, but not yellow**  
164 **scale cell precursors.**

165 Previous work with other nymphalid butterflies has shown that *a11* expression on  
166 larval wing discs resembles a modified pattern of the *aristaless* gene in flies (Martin &  
167 Reed, 2010). Using *in situ* hybridization and antibody staining, we found a similar  
168 pattern of expression of *a11* during larval wing disc development in white and yellow *H.*  
169 *cydno* (**Figure S1**). This expression pattern appears to be unrelated to the white vs.  
170 yellow color decision, hence we switched our attention to pupal stages.

171 Based on our CRISPR/Cas9 results, we hypothesized that AI1 would be present  
172 more widely across the wing, including the forewing band, of white *H. cydno* but would  
173 be absent from the band in yellow *H. cydno*. Furthermore, quantitative real-time PCR  
174 suggested that *a11* is expressed at all pupal stages but generally increases over time  
175 (Westerman et al., 2018). We therefore analyzed wings ranging from 2 days to 4 days  
176 (before scales harden and become impermeable to antibodies, **Figure 1**) after pupal  
177 formation (APF). We aimed our dissections to the 3 days APF mark because it allowed  
178 an efficient dissection without compromising the integrity of the wing and staining before  
179 any impermeability happens. In white *H. cydno* imaginal discs (Day 3 APF), AI1 was  
180 localized in developing scale cells for both future white and black scales (**Figure 4A-D**).



181 This localization of Al1 was observed everywhere across the pupal wing on both the  
182 dorsal and ventral sides. Al1 did not appear to co-localize with the scale cell nucleus  
183 when analyzing multiple vertical planes (**Figure 4A-D**) similar to what we observed in  
184 embryo appendages (**Figure 3**). Careful observation of a side reconstruction from Z-  
185 stacks highlights that Al1 was concentrated within the cytoplasm of scale cells and  
186 absent, at least during these time-points, within the nucleus (**Figure 4E**). In contrast, Al1  
187 was reduced or absent inside developing yellow scales (**Figure 4F-K**). This lack or  
188 lower levels of Al1 was more apparent during younger time points (day 2 to early day 3)  
189 and restricted to the dorsal side of the wing (**Figure S3**). Furthermore, as development  
190 continued, the overall level of Al1 on the dorsal side of yellow wings faded relative to  
191 that on the ventral side and this was not observed on white *H. cydno* wings (**Figure S3**).  
192 Using the vein patterns we inferred boundaries between future yellow and melanic parts  
193 of the wing and found a decrease in fluorescence associated with the transition from the  
194 melanic part of the wing to the yellow band (**Figure 5**).

195 Al1 is a homeodomain transcription factor and so we tested if it co-localized with  
196 the nucleus of scale cells at a later time point. Specifically, we examined wings at 4  
197 days APF. In contrast, we found that white and black scales in white *H. cydno* again  
198 showed high levels Al1 in the cytoplasm of scale cells but not in the nucleus (**Figure**  
199 **S4**). Similarly, yellow *H. cydno* wings did not show nuclear localization of Al1 in the  
200 future melanic regions either (**Figure S4**). We found no evidence that Al1 ever localized  
201 to the nucleus at 2 to 4 days APF, yet it is still possible that nuclear localization does  
202 occur at a time point that we did not observe or were not able to analyze. We verified  
203 antibody specificity by performing several negative controls and repeating staining in

204 white *H. cydno* butterflies with antibodies against two different A11 epitopes (**Figure**  
205 **S5A-D**).

206         These results suggest that the presence of A11 in scale cells may be relevant for  
207 scale development and pigmentation across the entire wing. Presence of A11 in the non-  
208 melanic band (which has already been specified by other genes like *wntA* [Martin, et al.,  
209 2012]) inhibits pigmentation resulting in white scales while absence or lower levels of  
210 A11 in these developing scales during a short window early in pupation results in the  
211 switch of white scales to yellow scales. To further test this hypothesis, we examined A11  
212 expression in CRISPR/Cas9 knockouts and RNA interference (RNAi) knockdowns,  
213 which allowed us to directly correlate changes in protein localization with adult  
214 phenotype.

215 **A11 CRISPR knockouts and RNA interference knockdowns reduce levels of A11**  
216 **and recapitulate the white to yellow color switch.**

217         To test our hypothesis that reduced or absent A11 promote the switch from white  
218 to yellow, we determined A11 levels by antibody staining in white *H. cydno* pupal wings  
219 with *a11* CRISPR/Cas9 knockouts (70% of the adult wings showed some level of mosaic  
220 color switch phenotype). Pupal wings analyzed at 3 days APF exhibited a depletion of  
221 A11 in patches across the wing (**Figure 6**). Our observations with adult butterflies  
222 suggest that these clones lacking A11 result in the switch of white and black scales to  
223 yellow and brown, respectively. We also characterized the range of CRISPR clone size  
224 and shape by observing a large number of CRISPR clones across the wings of white *H.*  
225 *cydno*, both in adults (**Figure S6**) and by antibody staining pupal wings (**Figure S7**).

226 As a complementary approach to test this hypothesis, we used electroporation  
227 mediated RNAi (Fujiwara and Nishikawa, 2016) to locally knockdown *a11* in a specific  
228 area of the wing. RNAi injections performed hours after pupation recapitulated the white  
229 to yellow color switch observed on adult wings observed previously with CRISPR/Cas9  
230 (**Figure S8A-B**). Pupal wing discs were also analyzed by immunostaining at 3 days  
231 APF to determine if there was any effect in the protein localization of AI1 after RNAi  
232 knockdown. As expected, we found that clones with scales lacking AI1 (**Figure S8C-D**)  
233 were concentrated near the injection site. Water injection controls showed no effect on  
234 developing scale cells from the injection or electroporation process (**Figure S5E-F**).  
235 Both of these results further support our hypothesis that the white scale fate is  
236 associated with high levels of AI1 and by contrast lower levels or absent AI1 is  
237 associated with the yellow scale fate.

238 **Ommochrome pathway genes are differentially expressed between white and**  
239 **yellow wings.**

240 To infer the potential downstream consequences of differential *a11* expression,  
241 we compared expression of a number of putative pigmentation genes between white  
242 and yellow *H. cydno* wings. The difference between yellow and white wings is ultimately  
243 due to the presence or absence of the yellow pigment 3-OHK. Based on this, we  
244 focused on two enzymes involved in the production of 3-OHK, Kynurenine formamidase  
245 (Kf) and Cinnabar (Hines, et al., 2012). In addition, there is experimental evidence that  
246 3-OHK or its precursors can be transported directly into the cell from the hemolymph  
247 (Gilbert, et al., 1988; Reed, et al., 2008). Therefore, we also analyzed the transporters  
248 White, Scarlet, Karmoisin and three members of the ATP-binding cassette (ABC) family,

249 all of which have been implicated in 3-OHK transport or pigment movement in other  
250 *Heliconus* species (Hines, et al., 2012; **Figure 7A**). We found that the enzyme  
251 Cinnabar, as well as the transporters White, Scarlet, and Karmoisin, showed increased  
252 relative expression in yellow wings compared to white wings (**Figure 7B**). The increase  
253 in relative expression peaked at 6 days APF and exhibited the highest levels in the  
254 medial part of the wing (future yellow band). Similar differences were also observed in  
255 proximal and distal portions of the wing but to a lesser extent. Kynurenine formamidase  
256 (**Figure 7B**) and the ABC transporters (**Figure S9**) showed different trends and did not  
257 differ between white and yellow individuals. The results suggest that the white fate is  
258 achieved by reducing the expression of enzymes and transporters needed to make and  
259 move 3-OHK. This, in turn, suggests that such reduction in activity of genes needed for  
260 yellow pigmentation may be a result of Al1's presence. We hypothesize that the  
261 reduction in Al1 expression observed earlier during pupation in yellow butterflies leads  
262 to the upregulation observed later in the enzyme Cinnabar and the transporters White,  
263 Scarlet, and Karmoisin.

#### 264 **Wnt signaling acts as an upstream positive regulator of Al1**

265 Previous work on the role of Al1 in the development of moth antennae has shown  
266 that its expression is upregulated by Wnt signaling (Ando, et al., 2018). Therefore, we  
267 sought to test the potential role of Wnt signaling in the regulation of Al1 on developing  
268 *Heliconius* wings. Given that the presence of Al1 results in white scale development, we  
269 hypothesized that inhibiting Wnt-mediated transcription should lead to reduced or  
270 absent Al1 and a white to yellow switch. (**Figure 8A**). In addition, we validated our  
271 manipulations on Wnt signaling in yellow butterflies by using an inhibitor against GSK3

272 which should activate Wnt signaling. Because AI1 is naturally downregulated in yellow  
273 butterflies, we hypothesized that activation of Wnt signaling should enhance AI1  
274 expression and promote a yellow to white color pattern switch (**Figure 8A**). Finally, as  
275 proof of concept that our pharmacological agents were affecting Wnt signaling, we also  
276 assayed the effects of inhibiting and activating Wnt signaling on the development of  
277 melanic scales, which is known to be under the control of WntA activity (Martin, et al.,  
278 2014). It has been shown that scales lacking WntA activity become paler or completely  
279 revert to a different color fate from the wing (Mazo-Vargas, et al., 2017). Furthermore,  
280 previous work has shown that increasing Wnt responsive activity in non-melanic parts of  
281 the wing by using the pharmacological agent Heparin switches non-melanic scales into  
282 melanic ones (Martin, et al., 2012). Therefore, we hypothesized that reduced Wnt  
283 activity in melanic portions of the wing should result in paler or non-melanic scales while  
284 activating Wnt in non-melanic parts of the wing should promote melanization (**Figure**  
285 **8A**).

286 Our data showed that exposing the pupal wing to the Wnt signaling inhibitor  
287 iCRT3 did produce a white to yellow switch as predicted (**Figure 8B-C**). In parallel,  
288 when the Wnt inhibitor was used on melanic parts we observed the change from black  
289 to a paler color as expected from a WntA knockdown (**Figure 8D-E**). Furthermore,  
290 wings exposed to the inhibitor also showed depleted levels of AI1 when comparing the  
291 dorsal (in closer contact to iCRT3) and ventral sections on the wing (**Figure 8E-G**).  
292 DMSO/PBS controls showed normal AI1 levels, highlighting that the procedure itself did  
293 not cause the observed effect (**Figure 8F**). Furthermore, the untreated wing of the same  
294 butterfly showed normal levels of AI1 as well. Yellow wings that were treated with the

295 GSK3 inhibitor CHIR99021, which promotes Wnt signaling, developed white scales as  
296 hypothesized (**Figure 8J-K**). Finally, we also observe several melanic scales within  
297 yellow band region as expected by a Wnt gain of function (**Figure 8L-M**).

298 Following exposure to iCRT3, some wings exhibited zones with peculiar scale  
299 phenotypes (**Figure 8H**). Examination of these zones showed that some of the scales  
300 were normal size and had normal Al1 levels but others were smaller and exhibited lower  
301 Al1 levels (**Figure 8H'**). To our knowledge, there have not been any reports of scales  
302 showing differential growth rates within the same scale fate. This may be a secondary  
303 effect from other gene targets affected by inhibited Wnt signaling and then the lower Al1  
304 levels are just a result of a smaller scale. An alternative explanation could be that Al1  
305 also influences processes related to scale growth and elongation (as shown in other  
306 systems; Campbell and Tomlinson, 1988; Schneitz, et al., 1993; Ando, et al., 2018) and  
307 by partially depleting its levels with iCRT3 we are altering those functions.

## 308 **Discussion**

309 Our results suggest a model for how the decision between white and yellow scale  
310 fate is achieved under the control of *al1* during wing development in *Heliconius*  
311 butterflies (**Figure 9**). Overall, our data show that Al1 accumulates within the cytoplasm  
312 of future white and melanic scales but is depleted from future yellow scales during the  
313 early stages of pupation (2 days APF). These results suggest that the presence of Al1  
314 within the cytoplasm is relevant for the specification and/or pigmentation of both white  
315 and black scales but not yellow scales. Evidence in favor of this model includes *al1*  
316 CRISPR/Cas9 knockout clones that span both white and black portions of the wing.

317 Scales within these clones show a switch to yellow and brown respectively. However,  
318 *a1* knockouts have no observed effects within the yellow band. Knockouts by  
319 CRISPR/Cas9 and knockdowns by RNAi result in depleted levels of *a1* in developing  
320 scales during early pupation as well as an associated switch from white to yellow  
321 scales. Our model is further informed by the preliminary observation that Al1 seems to  
322 promote the white color fate by negatively regulating genes important for the synthesis  
323 and transport of 3-OHK. In addition, we also validated the role of Wnt as an important  
324 upstream signal for Al1 activation providing a more complete developmental context.  
325 These functional data highlight how Al1 specifies the development of black and white  
326 scales and inhibits yellow pigmentation.

327         Our results for *aristalless1*'s role in the control of white and yellow wing coloration  
328 provide a different patterning scheme for the specification of wing color patterns.  
329 Previous work with other *Heliconius* color patterning genes has shown how the  
330 expression of these genes during earlier developmental stages (larval or pupal)  
331 resembles the future adult color pattern (Reed, et al., 2011; Martin, et al., 2012; Martin,  
332 et al., 2014; Nadeau, et al., 2016). This spatial prefiguring is very clear with all three of  
333 the previously described *Heliconius* color patterning genes: *optix* (Martin, et al., 2014),  
334 *wntA* (Martin, et al., 2012) and, *cortex* (Nadeau, et al., 2016). Furthermore,  
335 CRISPR/Cas9 knockouts of both *optix* (Zhang, et al., 2017) and *wntA* (Mazo-Vargas, et  
336 al., 2017) result in the lack of their respective color patterns. All of these genes, acting  
337 as activators, organize and promote their respective color patterns. On the other hand,  
338 we observe that Al1 is present in the entire wing and represses the yellow scale fate. It  
339 is the absence of that repression which ultimately results in the color switch and pattern

340 establishment we observe in the adult. While repression is a well-described  
341 developmental phenomenon, the color pattern variation achieved via repression of *al1*  
342 makes this a unique mechanism relative to other *Heliconius* color patterning genes.

343         Considering *al1* along with *wntA*, *optix*, and *cortex* it becomes clear that even  
344 though all of these genes control wing color patterning, they do so by very different  
345 mechanisms. For example, WntA is a signaling ligand that has its effect early within the  
346 larval imaginal discs (Martin, et al., 2012). As a signaling molecule WntA is restricted in  
347 its ability to diffuse to other nearby cells (Martin, et al., 2012) and therefore it may  
348 function primarily during larval development as opposed to pupal development where  
349 scale cells are more discrete and distantly distributed. Optix is a transcription factor that  
350 is directly localized to the nucleus of red scale precursors during mid-pupation (Martin,  
351 et al., 2014), possibly activating downstream targets needed to eventually produce red  
352 scales. Cortex is another unique scenario; as a cell cycle regulator in other systems, it is  
353 currently unknown how such a protein controls the melanic color patterns it resembles  
354 during its pupal expression (Nadeau, et al., 2016). Finally, Al1 is a homeodomain  
355 protein involved in appendage extension (Campbell and Tomlinson, 1988; Schneitz, et  
356 al., 1993; Beermann and Schroder, 2004, Ando, et al., 2018) which we have found to  
357 control multiple aspects of wing pigmentation. Al1 does this by localizing within scale  
358 cell precursors during early pupation yet it is specifically depleted from future yellow  
359 scales. This information highlights that very different types of genes can be major  
360 regulators of color patterning by employing various mechanisms associated with their  
361 identity. This developmental description of *al1* serves as the foundation for trying to  
362 answer the question of how differences in the levels of *al1* result in the white and yellow



363 color switch. Here we have provided evidence In favor of a model whereby *al1* is, by  
364 some direct or indirect mechanism, acting as a repressor of genes involved in yellow  
365 pigmentation.

366 In terms of a direct mechanism, the most straightforward scenario involves Al1  
367 repressing genes involved in yellow pigmentation (*cinnabar*, *white*, *scarlet*, and  
368 *karmoisin*) in the nucleus, as expected of a transcription factor. However, we are  
369 particularly intrigued by the observation that Al1 was never found localized in the  
370 nucleus during the analyzed time points. It is important to acknowledge that there could  
371 still be a specific time point in which Al1 translocation happens leading to the  
372 transcriptional control of downstream proteins needed for proper yellow pigmentation. In  
373 addition, there is a possibility that a post-translational modification—for example a  
374 cleavage event like the ones observed in BMPs proteins (Künnapuu, et al. 2009) or in  
375 another Paired-like homeodomain protein ESXR1 (N-terminus translocate to the  
376 nucleus and C terminus stays cytoplasmic, Ozawa, et al., 2004)—occurs with Al1 which  
377 affects our ability to observe nuclear co-localization. However, regardless of the  
378 possibility of our inability to observe a possible nuclear localization of Al1, there is still  
379 experimental evidence showcasing that some transcription factors can regulate other  
380 downstream processes and showcase dynamic states between cytoplasmic and nuclear  
381 localizations. For example, the protein Extradenticle (Exd) which is exported to the  
382 cytoplasm when Homothorax is not present (Abu-Shaar, et al., 1999) can exhibit  
383 different patterns of cytoplasmic or nuclear localization depending on what part of the  
384 leg imaginal disc is being patterned (Abu-Shaar, et al., 1999). Furthermore, in such a  
385 system an increase in the accumulation from cytoplasmic Exd can lead to an

386 overcoming of the signals keeping the protein cytoplasmic, allowing a portion of them to  
387 go into the nucleus even when Homothorax is not present (Abu-Shaar, et al., 1999).  
388 This is an interesting case considering that both Exd and Al1 are homeodomain proteins  
389 and similar accumulation is visible in our data. Therefore, it is possible that Al1 could act  
390 as a direct regulator (by an un-observed nuclear translocation or a cleavage event) of  
391 the differentially expressed genes needed for yellow pigmentation.

392 An alternative possibility is that Al1 regulates wing pigmentation indirectly via a  
393 process known as the Heterochrony hypothesis (Koch, et al. 2000). This is an  
394 interesting possibility based on what we know about the role of Aristaless in appendage  
395 extension (Campbell and Tomlinson, 1988; Schneitz, et al., 1993; Ando, et al., 2018)  
396 and based on our data showing dlfficiency of appendage extension following Al1  
397 knockouts. Although, Aristaless is described as a homeodomain transcription factor,  
398 most of the literature describing its expression and subcellular localization is related to  
399 its role during the extension of body appendages at both the single-cell and multicellular  
400 level (Campbell and Tomlinson, 1988; Schneitz, et al., 1993; Ando, et al., 2018). In  
401 *Drosophila*, Aristaless is well characterized for its role in the extension and proper  
402 patterning of the arista (a highly modifiable bristle that extends out of the antennae).  
403 Previous work has shown that if Aristaless is not present, pronounced size reductions  
404 and malformations of the arista occur (Schneitz, et al., 1993). Similar elongation defects  
405 to the ones we observed in our embryos are seen when Al1 expression is reduced in  
406 the multicellular antennae of moths. In this system, Al1 is needed for the proper  
407 patterning and the directional elongation of the cells that form part of the antennae.  
408 Furthermore, outside of insects the Aristaless-like Homeobox (ALX) protein is a key

409 regulator of rodent pigmentation (Mallarino, et al., 2016). Such regulation in principle is  
410 controlled by adjusting the rate of maturation of melanocytes, which are the pigmented  
411 cells that ultimately carry out the pigment synthesis of the hairs on the rodent body  
412 (Mallarino, et al., 2016). These observations support the idea that AI1 could be  
413 controlling pigmentation outcomes by altering rate of scale development. Another, piece  
414 of evidence that further promotes AI1 as a candidate capable of regulating the cell cycle  
415 and affecting scale maturation time, is again the Paired-like homeodomain protein  
416 ESXR1. The C-terminal region of ESXR1 stays in the cytoplasm after proteolytic  
417 cleavage and inhibits cyclin degradation which regulates the cell cycle and even  
418 produces cellular arrest (Ozawa, et al., 2004). This effect on the cell cycle produced by  
419 a cleaved component of a paired-like homeodomain protein makes it an appealing  
420 mechanism for the heterochronic shift we are hypothesizing. These examples raise the  
421 possibility that AI1 may be altering the developmental rate of scales which, in turn,  
422 influences color by indirectly altering expression windows of transporters and enzymes  
423 necessary for pigmentation. Yellow pigmentation in *Heliconius* happens just a few hours  
424 before eclosion, and therefore small alterations to the developmental timing of scales  
425 could result in the presence or absence of 3-OHK.

426 Future work will determine whether AI1 directly affects downstream target genes  
427 by regulating their transcription or indirectly as a secondary effect from altering scale  
428 maturation time. Our work serves as the first developmental description of AI1 and helps  
429 us understand butterfly color patterning as a stepwise process involving multiple layers  
430 of gene regulation terminating in pigmentation. Our work also highlights the diversity of  
431 genes and developmental mechanisms responsible for butterfly wing patterning.

## 432 **Methods**

### 433 **Butterflies rearing**

434 Butterflies were reared in greenhouses at the University of Chicago with a 16h:8h  
435 light:dark cycle at ~27°C and 60% – 80% humidity. Adults were fed Bird's Choice  
436 artificial butterfly nectar. Larvae were raised on *Passiflora biflora* and *Passiflora*  
437 *oerstedii*.

### 438 **CRISPR/Cas9 injections**

439 CRISPR/Cas9 experiments were performed following Westerman et al. (2018).  
440 We used HC\_gRNA\_02\_AI1 (GTTCTAGGAGAATCGTCCTTTGG) and  
441 HC\_gRNA\_03\_AI1 (GGAGGAGGTCTCTCGGAGGCTGG) gRNAs to generate  
442 deletions in *A11* in *Heliconius cydno galanthus* and *Heliconius cydno alithea* (**Figure 2**).  
443 The concentration of Cas9 (PNA Bio) and sgRNAs varied between 125 ng/μl–250 ng/μl  
444 and 83 ng/μl–125 ng/μl, respectively. Mixes were heated to 37°C for 10 min immediately  
445 prior to injection and kept at room temperature while injecting. To collect eggs for  
446 injections, we offered adults fresh *Passiflora oerstedii* and allowed ~2 hours for  
447 oviposition. Eggs were washed for 2 min in 7.5% benzalkonium chloride (Sigma  
448 Aldrich), rinsed thoroughly with water, and then arrayed on double-sided tape on a glass  
449 slide for injection. The eggs were injected using a 0.5-mm borosilicate needle (Sutter  
450 Instruments, Novato, CA, USA) and then kept in a humid petri dish until hatching, then  
451 transferred to a fresh host plant and allowed to develop. Adults were frozen and pinned  
452 before imaging. Following injection, 69 white and 4 yellow individuals reached  
453 adulthood. From them, 40 white, and 3 yellow individuals had a phenotype.

## 454 **Imaging of wild type and CRISPR adult wings**

455            Butterflies were pinned to flatten the wings and dry the tissue allowing for better  
456 imaging and then photographed. Details of wild type and adult wings were imaged using  
457 a Zeiss stereomicroscope Discovery.V20 with AxioCam adapter. Z-stacks and  
458 maximum intensity projections were produced using the Axiovision software. All Images  
459 had their intensity and scale bars edited with ImageJ Software.

## 460 **Butterfly wing dissections**

461            Butterflies were dissected at both larval and pupal stages following Martin et al.  
462 (2014). The protocol and adaptations to it were carried out as follows. Larvae and  
463 pupae were anesthetized in ice for 20 mins before dissection. To obtain the larval wing  
464 discs the larvae were pinned on the first and last segment. A small cut was performed  
465 using micro-dissection scissors on the second (forewing) and third segment (hindwing)  
466 to remove the imaginal discs. The discs were then pipetted out to a 16 well tissue  
467 culture plate with 1 ml per well of a 4% Paraformaldehyde solution for fixing. Larval  
468 imaginal discs were then fixed between 20 to 30 mins. To obtain the pupal wing discs  
469 the pupae were pinned on the head and most posterior section of the body. The denticle  
470 belt was then removed using dissection forceps to allow for easier access to the wing.  
471 Then micro-dissection scissors were used to carefully cut around the wing margin using  
472 the pupal cuticle as a guide. The piece of cuticle together with the forewing imaginal  
473 disc was removed and placed directly in a 16 well tissue culture plate with 1 ml per well  
474 of a 4% Paraformaldehyde solution for fixing. Pupal wings were fixed for 30 to 45 mins  
475 and then cleaned of any peripodial membrane by using fine forceps. After fixation, the  
476 tissue was then washed with PBST (PBS + 0.5% Triton-X100 for antibody staining or

477 with PBS, + 0.01% Tween20 for *in situ* hybridization) five times to then be stored at 4°C  
478 until stained (not more than 30 days).

#### 479 **Embryos fixation and dissection.**

480 Eggs were collected from plants between 24 to 36 hours after deposition. We  
481 adapted the fixation scheme from Brakefield et al. (2009). Eggs were first transferred to  
482 1.5 ml tubes and washed on PBS to remove any dirt. Eggs were then permeabilized  
483 and had their chorion removed with 5% Bleach (PBS) for 6 minutes. Eggs were then  
484 washed 5 times for 5 minutes in PBS to remove the excess bleach. We added 1 ml per  
485 tube of a 4% Paraformaldehyde solution (PBS) for fixing for 30 to 60 minutes. Eggs  
486 were then washed in PBST (PBS + 0.5% Triton-X100) 2 times for 5 minutes and then  
487 taken into a methanol series (25%, 50%, 75% methanol solutions in PBS at 4°C). Eggs  
488 were then transferred to 100% methanol and stored at -20°C for 5 days. Eggs were then  
489 transferred using plastic pipettes to a glass dissection plate with pre-chilled 100%  
490 methanol for dissection with fine forceps and dissection needles. Dissected embryos  
491 were then pipetted carefully into a 16 well tissue culture plate with 1 ml per well of chill  
492 methanol. These embryos were taken back through a 1 ml per well methanol series  
493 (75%, 50%, 25% methanol solutions in PBS at 4°C) for rehydration. Then embryos were  
494 washed twice with 1 ml of PBST per well and stored in PBST at 4°C for antibody  
495 staining.

#### 496 ***al1* in situ hybridization of larval wings**

497 We designed and synthesized *al1*-specific probes using the *H. cydno al1*  
498 transcript model (selected region shows 100% identity with *aristaless1* and 60% identity

499 with *aristaless2* transcript model). A 250 base-pair region from *a1* was amplified using  
500 primers (forward GTTCCCTCGCAGCCATTCTT; reverse  
501 TACGGCACTTCACCAGTTCT) by PCR, cloned into a TOPO vector (Invitrogen), and  
502 transformed into competent *E. coli* DH5a cells. We grew 3 replicates of 2 positive  
503 colonies and extracted DNA using a miniprep DNA extraction kit. We confirmed insert  
504 sequences via Sanger sequencing, linearized plasmids using Not1 and Sac1 restriction  
505 enzymes (New England Biolabs), and synthesized probes using a reverse transcription  
506 kit (Qiagen) with added DIG labeled nucleotides. The synthesized probes were purified  
507 using Qiagen RNAeasy columns.

508 *In situ* were performed following Ramos and Monteiro (2007). The entire  
509 process was carried out in 16 well tissue culture plates. Tissues stored in PBST (PBS,  
510 Tween20) were subjected to a mild digestion for 5 minutes in Proteinase K  
511 (0.025mg/ml). Digestion was stopped using a stop buffer (2mg/ml glycine in PBS 0.01%  
512 tween20). Tissue was washed 5 times for 5 min with PBST, then incubated in a pre-  
513 hybridization buffer (50%formamide, 5XSSC, 0.1% Tween20, and 1mg/ml Salmon  
514 Sperm DNA) for 1 hour at 55°C. 1 ml of Hybridization buffer (50%formamide, 0.01g/ml  
515 glycine, 5XSSC, 0.1% Tween20, and 1mg/ml Salmon Sperm DNA) with approximately  
516 50 ng of the used probe against *a1* was added to each well and left to incubate at 55°C  
517 for at least 48 hours. The tissue was then washed 5 times for 5 min in pre-hybridization  
518 buffer and then left washing in pre-hybridization buffer for 24 hours at 55°C. Wings were  
519 then blocked in 1% bovine serum albumin (BSA) in pre-hybridization buffer for 1 hr at  
520 4°C. Anti-DIG antibody was added (1:2000) to each of the wells and incubated  
521 overnight at 4°C. The tissue was then washed with PBST extensively (10 times or more

522 for 5 minutes) before development with BM-purple (1ml per well, Roche Diagnostics).  
523 Time of development was approximately 24 hours at 4°C. Stained tissue was imaged  
524 using Zeiss stereomicroscope Discovery.V20 with AxioCam adapter. Scale bars were  
525 added using ImageJ software. We analyzed wing imaginal discs of white butterflies at  
526 both fourth and fifth instar stages (3 individuals, wings split between sense and  
527 antisense probes).

### 528 **AI1 antibody staining of embryos, larval, and pupal wings.**

529 We raised polyclonal antibodies against two AI1 peptides using GenScript (New  
530 Jersey, USA). Peptide antigens (AI1-1: QSPASERPPPGSADC, AI1-2:  
531 DDSPRTTPELSHA) are located in the N-terminal 40 amino acids of AI1 and share 25%  
532 and 30% identity with AI2. Polyclonal antibodies were affinity purified after harvesting  
533 and tested for specificity by performing Dot blot tests as described in **Figure S2**. Raw  
534 data is available in **Source Data 1-2**.

535 We performed antibody staining in larval and pupal wings following Martin et al.  
536 (2014). We also applied this staining protocol to embryos. Tissue stored in PBST (PBS,  
537 Tritonx) was blocked in 1% BSA in PBST for two hours, then incubated overnight in 1  
538 mL blocking buffer and AI1 specific antibody (1:1000 for pupal wings and embryos,  
539 1:300 for larval wings). Tissue was washed twice quickly, then 5 times for 5 mins in ~0.5  
540 mL PBST, then incubated in 1 mL the secondary staining solution (goat anti-rabbit-  
541 AlexaFluor 488 [Thermofisher] at 1:1000, Hoechst 33342 at 1:1000 [Thermofisher] and  
542 Phalloidin-AlexaFluor555 at 1:200 [Thermofisher] in blocking buffer). The tissue was  
543 washed extensively and then mounted on glass slides using VectaShield (Vector Labs)  
544 on glass slides. Images were collected using a Zeiss LSM 710 Confocal Microscope



545 and processed using Zen 2012 (Zeiss) and ImageJ. For wild type antibody stainings we  
546 used pupal wings between 2-4 days APF of both white and yellow butterflies (20  
547 individuals for white and 6 individuals for yellow). For white CRISPR knockout butterflies  
548 we used wings 2 days APF, (3 individuals, 2 of which showed a phenotype), 3 days  
549 APF (4 individuals, 3 of which showed a phenotypes), and 4 days APF (3 individuals, 2  
550 of which showed a phenotype). For embryos we used 5 wild type and 4 CRISPR  
551 embryos (3 of which had a phenotype).

### 552 **Electroporation of pupal wings for RNA interference**

553 Electroporation-mediated RNA interference experiments were performed  
554 following Ando and Fujiwara (2013) and Fujiwara and Nishikawa (2016). We designed  
555 and synthesized Dicer substrate short interfering RNAs (DsiRNAs) targeting the first  
556 exon of *A11* using Integrated DNA Technologies (USA). A11.DsiRNA-1 targets 5'-  
557 ATGAATTTACTCCAAAAAGAAAG.

558 Fresh pupae, within the first hour of pupation, were used to perform the  
559 injections. For each experiment, the pupa was placed on a petri dish under a  
560 stereoscope and had its forewing displaced over a 1% agar (1xPBS) pad. One microliter  
561 of 250  $\mu$ M DsiRNA in water was injected into one of the pupal wings using borosilicate  
562 glass needles (with filament; GDC-1 from Narishige, USA) pulled on a Narishige PC-10  
563 with 1 step at setting 67. A 1xPBS bubble was placed on top of the injection site to  
564 perform electroporation using 5 x 280 ms pulses of 10 V over 5 sec. The wing was then  
565 placed back in its original position and the insect was allowed to recover for 24 hours  
566 before being hung again vertically. Some electroporated pupae were allowed to develop  
567 to adulthood and others were dissected 3 days APF for staining following the methods

568 described above. Approximately 45 pupae were treated. We used wings at 3 days APF  
569 from 5 individuals for Al1 stainings (3 of which showed a phenotype). From the  
570 remaining 40 pupae, 14 survived to at least pre-eclosion stages (5 showed an adult  
571 phenotype).

## 572 **qPCR gene expression analysis of downstream target genes**

573 We collected pupal forewings 4, 6, and 7 days APF of both white and yellow *Heliconius*  
574 *cydno* butterflies (three biological replicates of each color at each time point). The  
575 collected wings were cut into 3 sections (proximal, medial, and distal) using the venation  
576 pattern as a guide for consistent cuts (**Figure 8A**). Following dissection, the tissue was  
577 stored in RNA later (Ambion, USA) at -80°C until RNA extraction. The same sections  
578 from the two wings in each individual were grouped. Samples were thawed on ice, then  
579 washed twice with ice cold PBS before total RNA extraction using TRIzol (Invitrogen,  
580 USA) and the manufacturer's protocol. Extracted RNA was re-suspended in 50 µL of  
581 RNase free water. Purified RNA (2 µg) was used to perform cDNA synthesis using the  
582 ABI High Capacity cDNA Reverse Transcription Kit (Thermo Fisher 4368814) following  
583 the manufacturer's instructions. cDNA pools were diluted 10X in TE and stored at 4°C  
584 until qPCR.

585 All qPCRs were performed in 10 uL reactions with the BioRad iTaq Universal SYBR  
586 Green Supermix (Bio-Rad, USA) on a Bio-Rad CFX96 thermal cycler. We tested primer  
587 efficiencies using a 2-fold dilution series of one cDNA pool and only used those with  
588 efficiencies between 90% and 106% when possible (**Table S1**). We used *ef1a* as the  
589 ubiquitously expressed control gene to standardize our values during the qPCR assays.  
590 A single experimental gene and the control gene were tested for all samples in a single

591 plate, and all reactions were technically replicated twice. Relative expression levels  
592 were calculated using the  $\Delta C_T$  method. We then scaled  $\Delta C_T$  values for a particular gene  
593 to 1 by dividing sample  $\Delta C_T$  values by the highest  $\Delta C_T$  value for that gene. Calculations  
594 were performed in R (version 3.5.2). Raw data is available in **Source Data 3**.

### 595 **ICRT3 and CHIR99021 test on Wnt signaling**

596 The inhibitor of  $\beta$ -catenin responsive transcription (iCRT3, MedChemExpress Cat. No.:  
597 HY-103705, stock concentration; 10  $\mu\text{g}/\mu\text{L}$  in DMSO) and the inhibitor of the repressor  
598 GSK3  $\alpha/\beta$ , (CHIR99021, Sigma-Aldrich Cat. No.: 252917-06-9 stock concentration; 5  
599  $\mu\text{g}/\mu\text{L}$  in DMSO) were used on pupal wings 2 to 4 days APF. The pupae were cold  
600 anesthetized for 5 minutes before making a small opening on the cutical covering of the  
601 pupal wing. Then the piece of cuticle covering the opening was lifted in order to add 3 $\mu\text{L}$   
602 of the inhibitor solution (400ng/ $\mu\text{L}$  iCRT3/ CHIR99021 in PBS1x or in 1xPBS/DMSO). For  
603 controls, pupae with just the opening as well as pupae with 3  $\mu\text{L}$  of 1XPBS/DMSO were  
604 used. After the addition of the solutions, the piece of the cuticle was placed back and  
605 the pupa was left resting without hanging for 24 hours to allow for healing and recovery.  
606 If the wing was going to be imaged the dissection and staining was carried out as  
607 described above. In the case where the butterfly was going to be allowed to develop to  
608 adulthood it was hung again between 24 to 48 hours after exposure and taken back to  
609 the greenhouse. Approximately 60 pupae of white *H. cydno* were treated with ICRT3.  
610 We used wings between 2 to 4 days APF from 10 individuals for A11 antibody stainings  
611 (6 of which showed a phenotype [2 of them had scale size phenotypes]). Of the  
612 remaining 50 treated butterflies, 15 survived to at least pre-eclosion stages (7 showed

613 an adult phenotype). Three yellow *H. cydno* pupae were treated with CHIR99021, of  
614 which all 3 showed one or both phenotypes of yellow scales switching to white or black.

## 615 **Acknowledgments**

616 We thank Michael Hennessy and Carlos Sahagun for butterfly care and Steven Lane for  
617 assistance with dissections and staining. We also thank Urs Schmidt-Ott, Victoria  
618 Prince, Stephanie Palmer, and reviewers for discussion and/or comments on the  
619 manuscript.

## 620 **Funding**

621 E. X. B. was supported by the Initiative for Maximizing Student Development (NIGMS  
622 R25GM109439), an NIH Developmental Biology Training Grant (T32 HD055164), and  
623 the Art and Science Collaboration Grant at the University of Chicago. This project was  
624 funded by a Pew Biomedical Scholars Fellowship, NSF grant IOS-1452648, and NIH  
625 grant GM131828 to M.R.K.

## 626 **Competing interests**

627 The authors of this work have no competing interests.

628

## 629 **References**

- 630 Abu-Shaar, M., Ryoo, H. D., & Mann, R. S. (1999). Control of the nuclear localization of  
631 Extradenticle by competing nuclear import and export signals. *Genes &*  
632 *Development* 13(8), 935-945.
- 633 Ando, T., & Fujiwara, H. (2012). Electroporation-mediated somatic transgenesis for  
634 rapid functional analysis in insects . *Development*, 140, 454-458.

- 635 Ando, T., Fujiwara, H., & Kojima, T. (2018). The pivotal role of aristaless in development  
636 and evolution of diverse antennal morphologies in moths and butterflies. *BMC*  
637 *Evolutionary Biology*, 18(8).
- 638 Beermann, A., & Schroder, R. (2004). Functional stability of the aristaless gene in  
639 appendage tip formation during evolution. *Dev Gnes Evol* 214, 303-308.
- 640 Brakefield, P. M., Beldade, P., & Zwaan, B. J. (2009). Fixation and dissection of  
641 embryos from the African butterfly *Bicyclus anynana*. *Cold Spring Harbor*  
642 *Protocols*, 4(5).
- 643  
644 Campbell, G., & Tomlinson, A. (1988). The roles of the homeobox aristaless and Distal-  
645 less in patterning the legs and wings of *Drosophila*. *Development* 125, 4483-  
646 4493.
- 647 Campbell, G., Weaver, T., & Tomlinson, A. (1993). Axis Specification in the Developing  
648 *Drosophila* Appendage: The Role of wingless, decapentaplegic, and the  
649 Homeobox Gene aristaless. *Cell* 74, 1113-1123.
- 650 Chamberlain, N. L., Hill, R. I., Kapan, D. D., Gilbert, L. E., & Kronforst, M. (2009).  
651 Polymorphic butterfly reveals the missing link in ecological speciation. *Science*,  
652 326 (5954), 847-850.
- 653 Deshmukh, R., Baral, S., Gandhimathu, A., Kuwalekar, M., & Kunte, K. (2017). Mimicry  
654 in butterflies: co-option and a bag of magnificent developmental genetic tricks.  
655 *Wires, Developmental Biology* 7.
- 656 Dinwiddie, A., Null, R., Pizzano, M. C., Krup, L. A., & Patel, N. H. (2014). Dynamics of  
657 F-actin prefigure the structure of butterfly wing scales. *Developmental Biology*,  
658 392, 404-418.
- 659 Fujiwara, H., & Nishikawa, H. (2016). Functional analysis of gene involved in color  
660 pattern formation in lepidoptera. *Current opinion in insect science*, 17, 16-23.
- 661 Galant, R., Skeath, J. B., Paddock, S., Lewis, D. L., & Carroll, S. B. (1998). Expression  
662 pattern of a butterfly achaete-scute homolog reveals the homology of butterfly  
663 wing scales and insect sensory bristles. *Current Biology* 8(14), 807-813.
- 664 Gilbert, L. E., Forrest, H. S., Schultz, T. D., & Harvey, D. J. (1988). Correlation of  
665 Ultrastructure and Pigmentation Suggest How Genes Control Development of  
666 Wing Scales of *Heliconius*. *Journal of Research on the Lepidoptera*, 26, 141-160.
- 667 Hines, H. M., Papa, R., Ruiz, M., Papanicolaou, A., Wang, C., Nijhout, H. F., . . . Reed,  
668 R. D. (2012). Transcriptome analysis reveals novel patterning and pigmentation  
669 genes underlying *Heliconius* butterfly wing pattern variation. *BMC Genomics*, 13  
670 (288).

- 671 Koch, B. F., Lorenz, U., Brakefield, P. M., & French-Constant, R. H. (2000). Butterfly  
672 wing pattern mutants: developmental heterochrony and co-ordinately regulated  
673 phenotypes. *Dev Genes Evol*, 210, 536-544.
- 674 Kronforst, M. R., & Papa, R. (2015). The Functional Basis of Wing Patterning in  
675 Heliconius Butterflies: The Molecules Behind Mimicry. *Genetics*, 200, 1-19.
- 676 Kronforst, M. R., Young, L. G., Kapan, D. D., McNeely, C., O'Neill, R. J., & Gilbert, L. E.  
677 (2006). Linkage of butterfly mate preference and wing color preference cue at the  
678 genomic location of wingless. *PNAS*, 103 (17), 6575-6580.
- 679 Künnapuu, J., Björkgren, I., & Shimmi, O. (2009). The Drosophila DPP signal is  
680 produced by cleavage of its proprotein at evolutionary diversified furin-recognition  
681 sites. *PNAS*, 106(21), 8501-8506.
- 682 Livraghi, L., Hanly, J. J., van Bellghem, S. M., Montejo-Kovacevich, G., van der Heijden,  
683 E. S., ... Jiggins, C. D. (2021). Cortex cis-regulatory switches establish scale  
684 colour identity and pattern diversity in Heliconius. *ELife*, 10.
- 685
- 686 Mallarino, R., Henegar, C., Mirasierra, M., Manceau, M., Scharadin, C., Vallejo, B. S., ...  
687 . Hoekstra, H. E. (2016). Developmental Mechanisms of Stripe Patterns in  
688 Rodents. *Nature*, 539, 518-523.
- 689 Martin, A., & Reed, R. (2010). wingless and aristaless2 Define a Developmental Ground  
690 Plan for Moth and Butterfly Wing Pattern Evolution. *Mol. Biol. Evol.*, 27 (12), 2864-  
691 2878.
- 692 Martin, A., McCulloch, K. J., Patel, N. H., Briscoe, A. D., Gilbert, L. E., & Reed, R. D.  
693 (2014). Multiple recent co-options of Optix associated with novel traits in adaptive  
694 butterfly wing radiations. *EvoDevo* 5(7).
- 695 Martin, A., Papa, R., Nadeau, N. J., Hill, R. I., Counterman, B. A., Halder, G., ... Reed,  
696 R. D. (2012). Diversification of complex butterfly wing patterns by repeated  
697 regulatory evolution of a Wnt ligand. *PNAS*, 109 (31), 12632-12637.
- 698 Mazo-Vargas, A., Concha, C., Livraghi, L., Massardo, D., Wallbank, R. W., Papador, J.  
699 D., ... Martin, A. (2017). Macroevolutionary shifts of WntA function potentiate  
700 butterfly wing-pattern diversity. *PNAS* 114(40), 10701-10706.
- 701 Miyawaki, K., Inoue, Y., Mito, T., Fujimoto, T., Matsushima, K., Shinmyo, Y., ... Noji,  
702 S. (2002). Expression patterns of aristaless in developing appendages of *Gryllus*  
703 *bimaculatus* (cricket). *Mechanisms of Development*, 113, 181-184.
- 704 Moczek, A. P. (2005). The Evolution and Development of Novel Traits, or How Beetles  
705 Got Their Horns. *BioScience*, 55 (11), 937-951.
- 706 Nadeau, N. J. (2016). The gene cortex controls mimicry and crypsis in butterflies and  
707 moths. *Nature*, 534, 106-110.

- 708 Ozawa, H., Ashizawa, S., Naito, M., Yanagihara, M., Ohnishi, N., Maeda, T., . . .  
709 Hatakeyama, M. (2004). Paired-like homeodomain protein ESXR1 possesses a  
710 cleavable C-terminal region that inhibits cyclin degradation. *Oncogene*, 23(39),  
711 6590-6602.
- 712 Ramos, D., & Monteiro, A. (2007). In situ Protocol for Butterfly Pupal Wings Using  
713 Riboprobes . *J Vis Exp.*, 4.
- 714 Reed, R. D., McMillan, W. O., & Nagy, L. M. (2008). Gene expression underlying  
715 adaptive variation in *Heliconius* wing patterns: non-modular regulation of  
716 overlapping cinnabar and vermilion prepatterns. *Proc. R. Soc. B* 275, 37-45.
- 717 Reed, R. D., Papa, R., Martin, A., Hines, H. M., Counterman, B. A., Pardo-Díaz, C., . . .  
718 McMillan, W. O. (2011). *optix* Drives the Repeated Convergent Evolution of  
719 Butterfly Wing Pattern Mimicry . *Science* 333, 1137-1141.
- 720 Schneitz, K., Spielmann, P., & Noll, M. (1993). Molecular genetics of *aristaless*, a *prd*-  
721 type homeo box gene involved in the morphogenesis of proximal and distal  
722 pattern elements in a subset of appendages in *Drosophila*. *Genes and*  
723 *Development* 7(1), 114-129.
- 724 Van Belleghem, S. M., Rastas, P., Papanicolaou, A., Martin, S. H., Arias, C. F., Supple,  
725 M. A., . . . Papa, R. (2017). Complex modular architecture around a simple toolkit  
726 of wing pattern genes. *Nature ecology & evolution*, 1, 1-12.
- 727 Westerman, E., VanKuren, N., Massardo, D., Tenger-Trolander, A., Zhang, W., Hill, R.  
728 I., . . . Kronforst, M. R. (2018). *Aristaless* Controls Butterfly Wing Color Variation  
729 Used in Mimicry and Mate Choice. *Current Biology* 28(21), 3469-3474.
- 730 Zhang, L., Mazo-Vargas, A., & Reed, R. D. (2017). Single master regulatory gene  
731 coordinates the evolution and development of butterfly color and iridescence.  
732 *PNAS* 114(40), 10707-10712.

733

## 734 Main Figures

735 **Figure 1: Summary of *Heliconius* wing pattern development.** The top panel  
736 highlights the wing imaginal discs across the multiple phases of wing development at  
737 the organismal level. The middle panel describes developmental changes observed in  
738 the functional cells (scale cell in magenta and socket cell in dark blue) that will  
739 eventually become the pigmented scales (stages of scale development adapted from  
740 Dinwiddie, et al., 2014). The bottom panel of the image consolidates our knowledge  
741 about when the known patterning genes *wntA*, *cortex* and *optix* are expressed and  
742 when the expression results in terminal color synthesis of melanin and ommochromes,  
743 respectively. The yellow pigment (3-OHK) deposition window is also shown. Dashed  
744 gray lines separate the different phases.

745

746 **Figure 2: Wild type and *al1* CRISPR/Cas9 knockout forewings of white and yellow**  
747 ***H. cydno*.** (A) Full adult forewing view of wild type and *al1* knockouts of both white and  
748 yellow *H. cydno*. Blue arrowheads highlight mutant yellow clones inside the white  
749 regions and red arrowheads highlight mutant brown clones inside the melanic regions of  
750 wing. (B) Higher magnification view of the mutant parts of the wing for both white (top  
751 panel) and yellow (bottom panel) *H. cydno* butterflies. Dashed blue lines highlight the  
752 parts of the clone that switched from white to yellow and dashed red lines highlight the  
753 parts of a clone that switched from black to brown.

754

755 **Figure 3: Immunodetection of *Aristaless1* in wild-type and -*Al1* CRISPR**  
756 ***Heliconius cydno* embryos.** (A) Immunodetection of *Al1* in wild-type embryos. White  
757 boxes highlight the mandibula (B), thoracic legs (C), and abdominal legs (D) zones  
758 shown at a higher magnification in the next panels. (E-F) Immunodetection of *Al1* in  
759 injected -*Al1* CRISPR embryos. (G) Higher magnification of the abdominal prolegs  
760 showcasing a zone lacking *Al1*. The segments and appendages are labeled for the full  
761 view embryos (A, E-F). Full embryo views highlight Antennal (Ant.), eyes, Mandibular  
762 (Mn), Maxillar (Mx), and Labial (Lb) head appendage precursors. The 3 pairs of thoracic  
763 legs, 4 pairs of abdominal prolegs, and the pair of anal prolegs buds are also marked.  
764 Panels show detection of DNA (B,C,D,G), F-actin (B',C',D',G' ), *Al1* (B'',C'', D', G''), and  
765 a merge (A, B''',C''',D''',E-F,G''').

766

767 **Figure 4: Immunodetection of *Aristaless1* in white and yellow *Heliconius cydno***  
768 **pupal forewings.** (A) Adult forewing of a white *Heliconius cydno*. (B) *Al1* detection in a  
769 full pupal wing of a white *Heliconius cydno* (3 days APF). (C) Details of *Al1*, DNA and  
770 actin detection in precursor scale cells of future melanic scales from a white *Heliconius*  
771 *cydno*. (D) *Al1* detection in precursor scale cells of future white scales. (E) Side digital  
772 reconstruction from z-stack showing *Al1* within precursor scale cells from the white part  
773 of the wing. (F) Adult forewing of a yellow *Heliconius cydno*. (G) *Al1* detection in a full  
774 pupal wing of a yellow *Heliconius cydno*. (H) Details of *Al1* detection in precursor scale  
775 cells of future melanic scales from a yellow *Heliconius cydno*. (I) *Al1* detection in  
776 precursor scale cells of future yellows scales. (J-K) Side digital reconstruction from z-  
777 stack showing differences in *Al1* detection within precursor scale cells from yellow and  
778 melanic portions of a yellow *Heliconius cydno* wing. Panels show detection of DNA  
779 (C,D,E,H,I), F-actin (C',D',H',I' ), *Al1* (C'',D'', E', H'',I''), F-actin/DNA (B, G) and a merge  
780 (C''', D''',E''',H''',I''',J-K) view. Scale bars: B, G are 1000  $\mu\text{m}$ ; C-E and H-I are 100  $\mu\text{m}$ ;  
781 J-K are 50  $\mu\text{m}$ .

782



783 **Figure 5: Immunodetection of Aristaless1 at the boundary between black and**  
784 **yellow scales in *Heliconius cydno* pupal forewing imaginal discs (3 Days APF).**  
785 **(A)** Dorsal view of an adult yellow *H. cydno* forewing. **(B)** Quantification of the pixel gray  
786 value of a transect spanning across the presumptive yellow patch flanked by melanic  
787 regions at the stage of 3 Days APF. **(C)** Side view digital reconstruction from z-stack to  
788 observe the AI1 detection at the boundary between future melanic and yellow scales.  
789 Panel show detection AI1 **(C)** and a merged version **(C')** with DNA and F-Actin  
790 detection. The orange arrow indicates the adult corresponding orientation for both the  
791 transect (white dashed line) for the B panel and the Z-stack of the side reconstruction of  
792 C. Scale bars: C, 50  $\mu$ m.

793

794 **Figure 6: Immunodetection of Aristaless1 in *a11* CRISPR knockout pupal wings of**  
795 **white *Heliconius cydno* forewings (3 Days APF).** **(A)** Immunodetection of AI1 in an  
796 *a11* CRISPR knockout forewing shows AI1 depleted clones. **(B)** Closer view of an  
797 extensive clone (white dashed line) within the distal edge of the wing. **(C)** Side digital  
798 reconstruction from a z stack showing the transition from high AI1 (left, outside the  
799 clone) to absent AI1 (right, within the clone). Panels show detection of DNA (C), AI1  
800 (C'), F-actin (C''), and a merge (C''') view. **(D-E)** Views of the scale precursors inside  
801 and outside of different CRISPR clones. Panel A, B, D, and E show both AI1 and F-  
802 actin.

803

804 **Figure 7: Analysis of candidate pigmentation genes that may act downstream of**  
805 **Aristaless1.** **(A)** The top panel highlights distinct sections of the adult wing analyzed  
806 (left) and a pathway model (right) for the candidate genes of interest. The model  
807 showcases a view of the scale and socket cells and highlights the genes involved in the  
808 synthesis and transport (direct or after synthesis) of 3-hydroxykynurenine (**3-OHK**)  
809 yellow pigment. Enzymes: Kynurenine formamidase (**Kf**), Cinnabar (**Cb**); Transporters:  
810 White (**Wt**), Scarlet (**Sc**), Karmoisin (**Kar**). **(B)** Relative expression levels of each  
811 candidate gene in white and yellow pupal forewings sections (proximal, media, distal)  
812 across 3 different time points (4, 6, 7 days APF). The relative expression values are  
813 scaled to the highest value across the wing sections for each of the genes. Enzymes  
814 are shown in the middle panel and transporters on the bottom panel. Statistical  
815 significance was assessed using t-test and *p* values are shown for significant (asterisk)  
816 and nearly significant comparisons.

817

818 **Figure 8: Aristaless1 is regulated by Wnt signaling.** **(A)** Scheme for the phenotypic  
819 color outcome for both wild type white and yellow butterflies. The hypothesized  
820 scenarios caused after exposure to the iCRT3 and CHIR00921 inhibitors affecting Wnt  
821 signaling is presented for both the white and yellow background. In it, we expect the  
822 white to yellow color switch following the reduction in AI1 levels caused by diminished

823 Wnt signaling and the yellow to white switch following increase *Al1* as a cause from  
824 enhancing Wnt signaling. Outcomes with respect to melanic scales are also shown as a  
825 read out from *WntA* activity. (B) Adult white wing injected at 3 days APF with *iCRT3* and  
826 observed after eclosion. White square is shown as a detail view in C'. (C) Adult wing on  
827 the opposite side to the injection. (D-E) Adult right wing showing the effects of *iCRT3* on  
828 melanic scales. Detailed view of the affected side (E) and scales are shown (E'). (F-I)  
829 Developmental validation of the *iCRT3* effects on *Al1* protein levels. The injection  
830 control (F) with 1Xpbs/DMSO is show as well as the dorsal (G) and ventral (H) sides of  
831 a pupal wing exposed to the drug around 3 days APF and dissected 24 hours after  
832 exposure to the agent. A different full wing with the same treatment is shown (I) with a  
833 wider area of effect. Severe scale size defects are visible in an amplified view from the  
834 white square (I'). (J) Different parts of an Adult yellow wing injected at 3 days APF with  
835 *CHIR00921* and overserved after eclosion. (K) Ventral side of a different individual  
836 treated in the same way. (L-M) Adult right wing showing the effects of *CHIR00921* with  
837 respect to the formartion of melanic scales. Details are shown (M). Asterisk showcases  
838 injection sites. In F-G the injection site is on the left outside the field of view.

839

840 **Figure 9: Graphical model for the role of *Al1* in the specification *H. cydno* wing**  
841 **color.** (A) White scale fate in which *Al1* presence in developing scale cells lead to the  
842 inhibition of genes needed for yellow pigment uptake and production. (B) Yellow scale  
843 fate in which, reduced or absent *Al1* results in the activation of genes involved with the  
844 production and movement of the yellow pigment 3-OHK.

845

## 846 **Supplemental Figures:**

847 **Supplemental Figure 1: Detection of *aristaless1* by mRNA *in situ* hybridization**  
848 **and *Al1* specific antibodies in white *H. cydno*.** (A) mRNA *in situ* hybridization of 5th  
849 instar larval forewing and hindwing. (B) *Al1* antibody staining of 5th instar larval forewing  
850 and hindwing. Dotted lines are used to highlight previously described domains of  
851 expression from Martin and Reed (2010). White dotted lines showcase the anterior  
852 curved domain (both forewings and hindwings) and posterior narrow band (hindwings).  
853 The yellow dotted lines highlight the horizontal expression domain along the anterior  
854 veins of forewings. The green dotted line highlights a vertical expression domain  
855 observed only in our *in situ* hybridization forewing. This domain has previously been  
856 reported as an *Al2* expression pattern, suggesting some cross-reaction from the used  
857 probe. The yellow arrowhead highlights a posterior expression domain not previously  
858 described before and observed in both *in situ* and antibody-stained forewings.

859

860 **Supplemental Figure 2: Dot blot test to determine the specificity of the *Al1***  
861 **antibodies.** We spotted 2 uL each of three amounts of each antibody, peptide antigen,

862 or protein prep (Wing #1, Wing #2), then probed blots using 5 ug/mL A11-1 (**A**), 5 ug/mL  
863 A11-2 (**B**), or no primary antibody (**C**). All blots were then probed with goat anti-rabbit  
864 secondary antibody conjugated to alkaline phosphatase (Invitrogen 65-6122). All three  
865 blots were developed for 15 min in the same container using Roche BM Purple AP  
866 substrate (11442074001) before imaging on a BioRad GelDoc XR+. Dot amounts:  
867 antibodies and peptides = 200 ng, 20 ng, 2 ng; protein preps: 1X, 0.2X, 0.05X.

868

869 **Supplemental Figure 3: Temporal and spatial differences in A11 protein**  
870 **localization between white and yellow *Heliconius cydno* wings. (A)**  
871 Immunodetection of A11 in white *H. cydno* forewings at different stages of early pupation  
872 (2 to 4 days APF) for both the ventral and dorsal side of the wing. (**B**) Immunodetection  
873 of A11 in yellow *H. cydno* forewings at comparable stages to the white wings in panel A.  
874 Both ventral and dorsal parts of the wing are shown as well. Both panels show detection  
875 of A11 and actin.

876

877 **Supplemental Figure 4: Immunodetection of Aristaless1 in melanic scales for**  
878 **both white and yellow *Heliconius cydno* pupal forewings (late 4 Days APF). (A)**  
879 Imaging of longer border scales to appreciate details on the protein subcellular  
880 localization. View of bi-forked (**B**) and tri-forked (**C**) scales with accumulating A11 in the  
881 scale cell body of a yellow *H. cydno* highlighting lack of co-localization with the nucleus.

882

883 **Supplemental Figure 5: Immunodetection of Aristaless1 in white *Heliconius***  
884 ***cydno* pupal forewings (between 2-3 days APF) across several control setups. (A)**  
885 View of A11 detection in scales by using the A111 specific antibody (antibody used for all  
886 the immunodetections assays shown in the manuscript). (**B**) A11 detection in scales by  
887 using the A112, a different A11 specific antibody targeting another part of the protein. (**C**)  
888 Negative control wing without any primary antibody. (**D**) Negative control wing in which  
889 the primary antibody was substituted by the pre-immune serum. (**E-F**) A11  
890 Immunodetection after a control water injection and electroporation. (**E**) View of an  
891 extended portion of the wing. (**F**) Closer view of scale cells to highlight details of A11  
892 protein detection following the manipulation. Panel show detection of DNA (A-F), F-actin  
893 (A'-F'), A11 (A''-F''), and merge (A'''-F'''). The water injection site is located on the right  
894 corner outside of the field of view of the image.

895

896 **Supplemental Figure 6: Showcase of the clones variation in A11 CRISPR adults.**  
897 (**A**) Whole butterfly views (both dorsal and ventral sides) of adults with A11 CRISPR  
898 clones. The numbered squares are highlighted as closer views of the clones (**B**). Some  
899 of the clones in which scales shift from white to yellow are highlighted by the blue dotted

900 line and the clones in which scales shift from black to brown are highlighted by the red  
901 dotted line.

902

903 **Supplemental Figure 7: Showcase of the clones variation by immunodetection in**  
904 **AI1 CRISPR pupal wings (48 to 72 APF).** (A) Low density to no clone forewing. (B)  
905 High clone density forewing highlighting scales lacking AI1. (C) Low density to no clone  
906 forewing. (D) High clone density hindwing highlighting scales lacking AI1. (E) Another  
907 High clone density forewing in which the clones have been highlighted with a white  
908 dotted line. (I-K) Details across multiple wings of different stages (48 to 72 APF) are  
909 shown to highlight the lack of AI1 within the clones. In all the detail views the boundaries  
910 are shown with a white dotted line.

911

912 **Supplemental Figure 8: Immunodetection of *Aristaless1* in *al1* RNAi knockdown**  
913 **pupal forewings of white *Heliconius cydno* (3 Days APF).** (A) *al1* knockdown adult  
914 wings showing areas of the wing switching from white scales to yellow scales. (B)  
915 Higher magnification of the white square shown in A. (C) Immunodetection of AI1 in an  
916 *al1* knockdown pupal imaginal disc (3 days APF) showing patches of reduced or absent  
917 AI1 localization. (D) Side digital reconstruction (white dashed line indicate cross section  
918 in C'') from a z-stack of one of the patches in panel C to observe scale morphology and  
919 the absence of *al1* in presumptive affected scales. Panel show detection of DNA (C,D),  
920 AI1 (C',D') and a merge (C'', D'') view. Scale bars: A, 500  $\mu\text{m}$ ; B-C, 100  $\mu\text{m}$ ; D, 50  $\mu\text{m}$ .

921

922 **Supplemental Figure 9: Downstream ABC transporters qPCR expression analysis**  
923 **between white and yellow *H. cydno* butterflies.** Relative expression levels of each of  
924 the analyzed ABC transporters in white and yellow pupal forewings sections (proximal,  
925 media, distal) across 3 different time points (4, 6, 7 days APF). The relative expression  
926 values are scaled to the highest value across the wing sections for each one of the  
927 genes. The significance in the observed differences was tested using t-test. None of  
928 tested differences showed significance.

929

930

931

932

933 **Supplemental Table:**

934 **Table S1: qPCR gene primers and efficiency tests**

| Gene                     | Fwd primer seq       | Rvs primer seq          | Product Length | Efficiency (%) |
|--------------------------|----------------------|-------------------------|----------------|----------------|
| <i>ef1a</i><br>(control) | GCTGACGGTAAATGCCTCAT | CAGGAGCGAACACAACAATG    | 180            | 96             |
| <i>kf</i>                | CACCGCTACGCTACCAGAAA | CCCTGAAGCCGGTATGATCC    | 189            | 106            |
| <i>cinnabar</i>          | ATGGACAGGGTATGAACGCC | CATCTATCGCCTTCCGGGTG    | 213            | 101            |
| <i>white</i>             | CAGGAGTTGAAAGCATCGCG | GTCGTGTGCGCCATAGTAGT    | 180            | 99             |
| <i>scarlet</i>           | AATTTTGGGTGACATCGCG  | ACGACACATTAATAACAGCAACA | 156            | 103            |
| <i>karmoisin</i>         | TGGCCGGGTTAATTCATGCT | TTCGAGTTCGTCTGCTAGTTT   | 171            | 90             |
| <i>ABC1</i>              | CCGCGTCATCGTCATGGATA | AGCACCCTGTCGCTTACTT     | 250            | 55             |
| <i>ABC2</i>              | GTGGAGCTAAAAGAGGCGGT | TTCTGTAATAGGACGTGCGG    | 215            | 94             |
| <i>ABC3</i>              | ATTCCGCCTCGCAATTGTTG | GCCGGTATTGCAGCTTTCAA    | 219            | 92             |

935

### 936 **Source Data Files:**

937 **Source Data File 1: Zip file with the raw unedited blot images.** Sections of these 3  
938 images were used to create Supplemental Figure 2.

939 **Source Data File 2: Uncropped Blot images with details on each section of the**  
940 **blot.** Sections of these 3 images as well as part of the data in the associated tables  
941 were used to create Supplemental Figure 2.

942 **Source Data File 3: Raw  $\Delta Cq$  data from our qPCR analysis used to calculate the**  
943 **relative expression of genes of interest.** The data of these source file is used to  
944 produce the plots in Figure 7 and Supplement Figure 9 ad described in the method  
945 section.

946

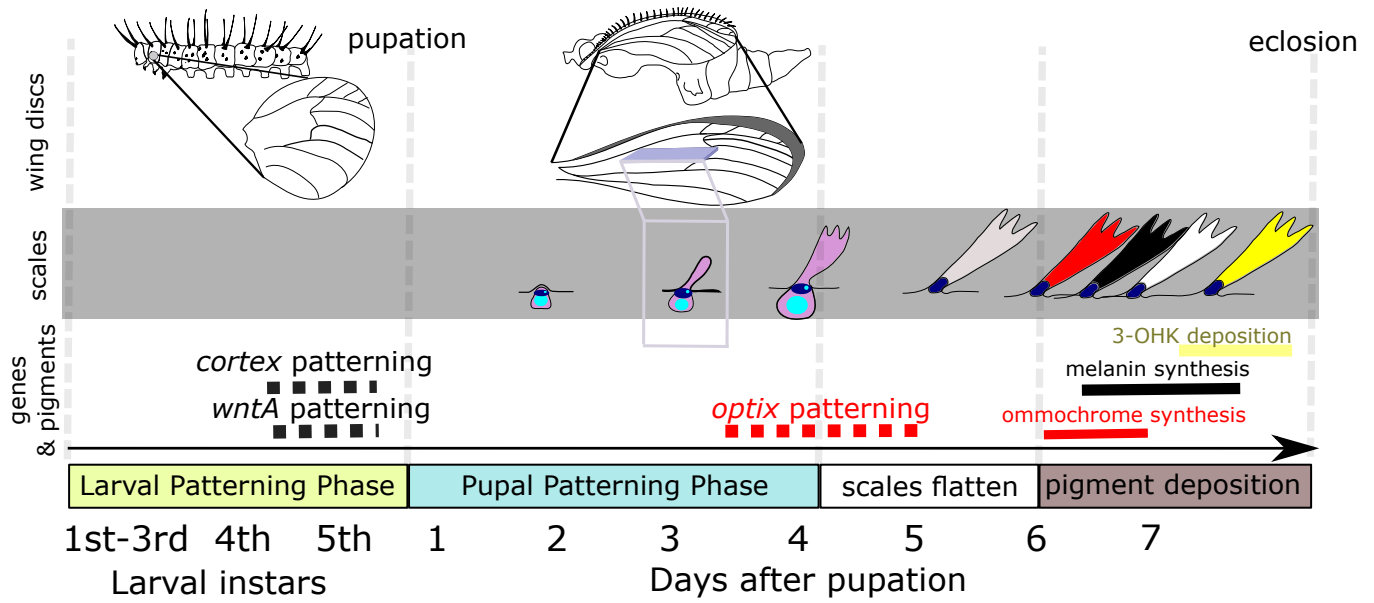

A

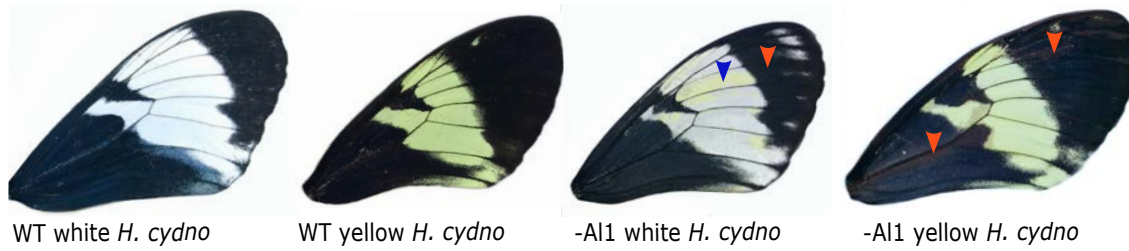

B

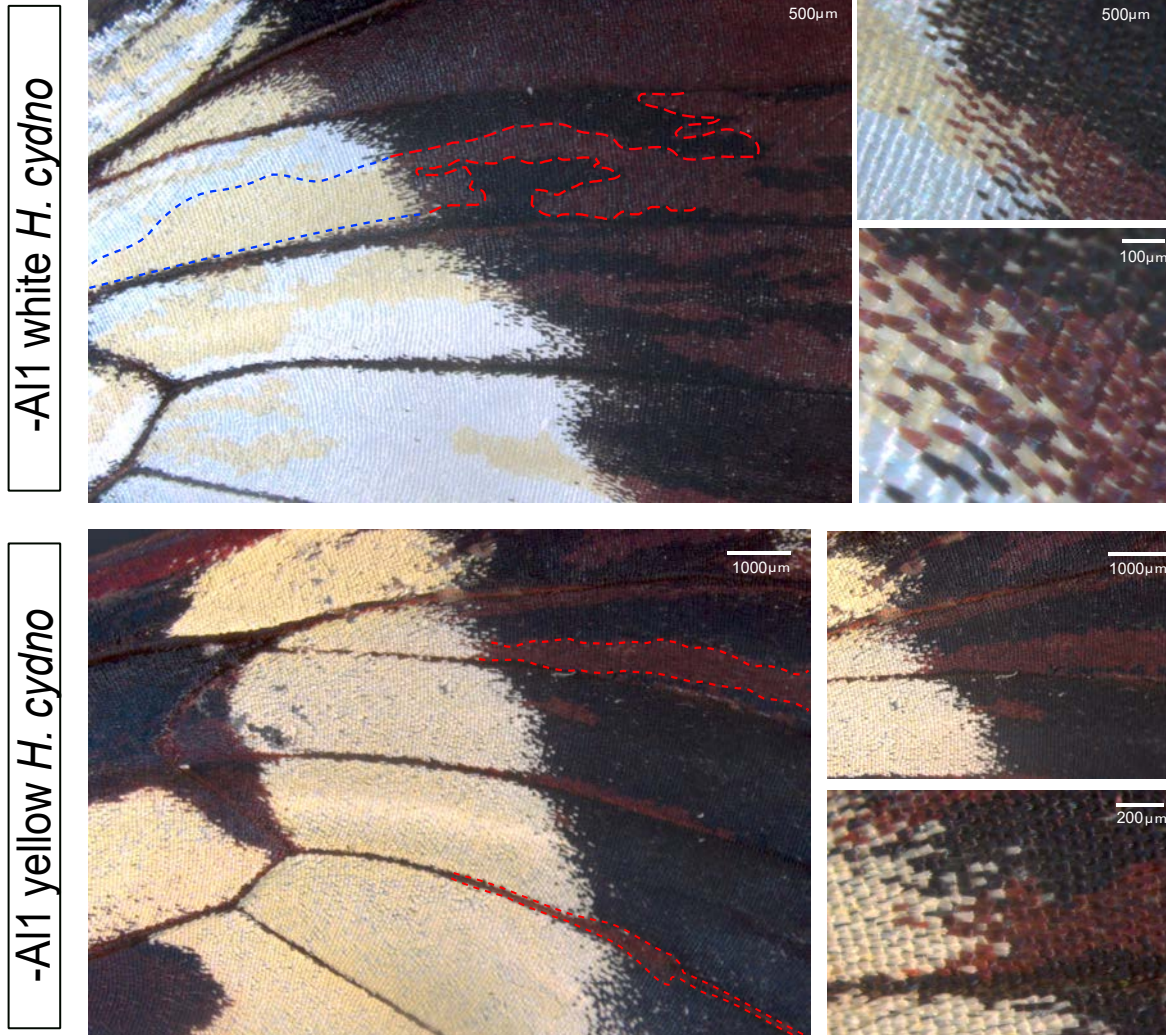

*H. cydno* WT

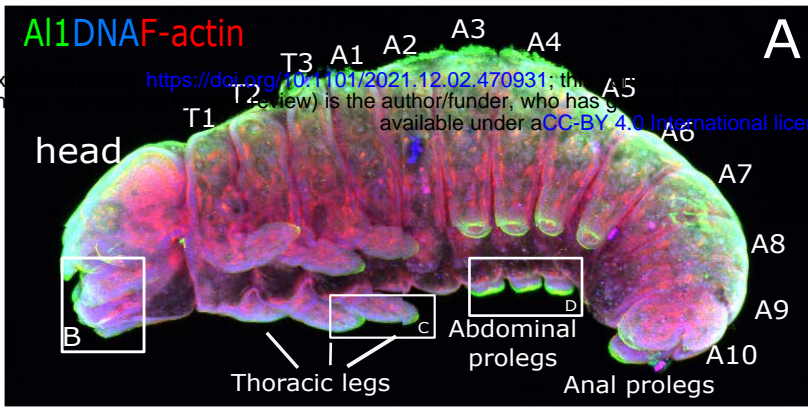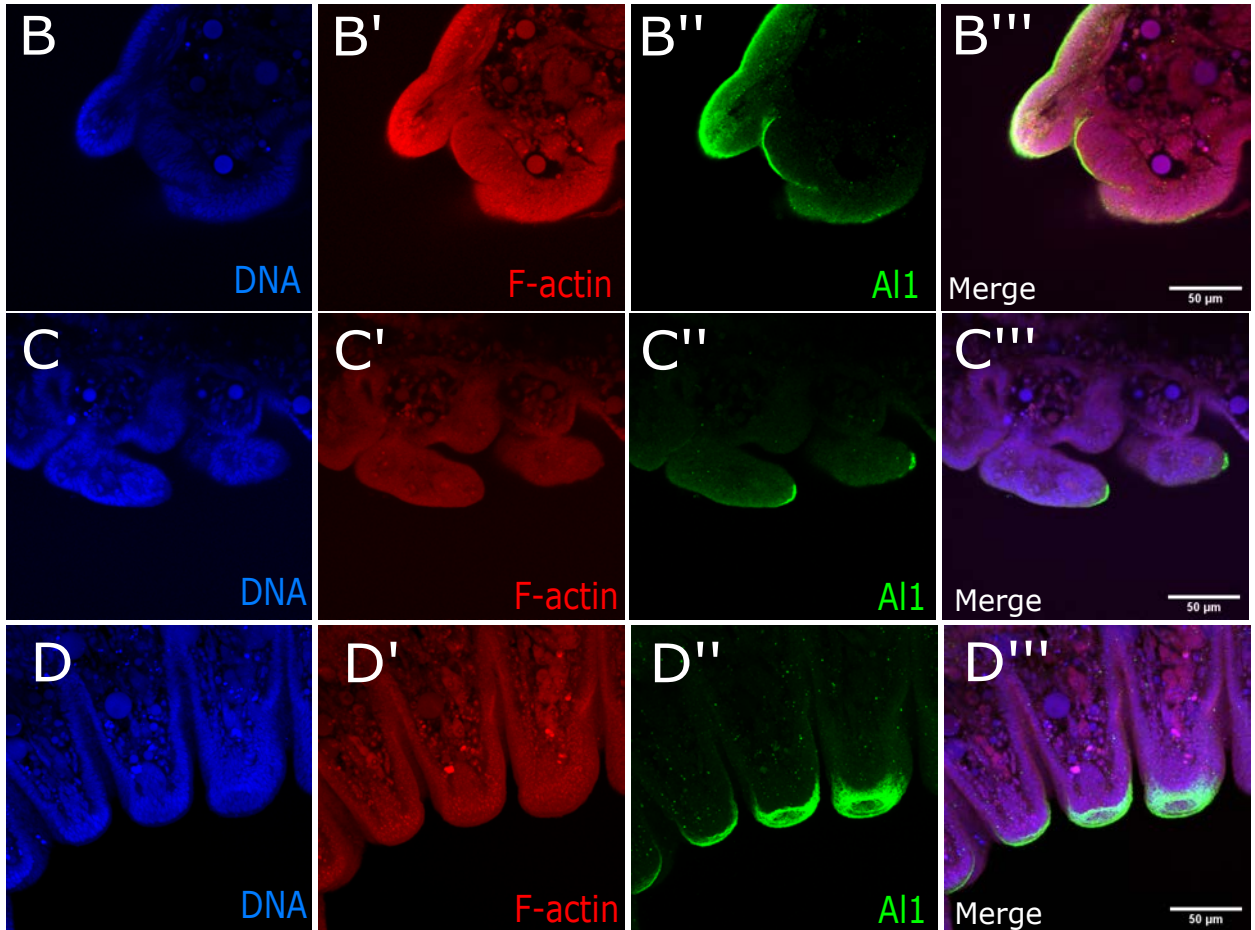

-AI1 *H. cydno* WT

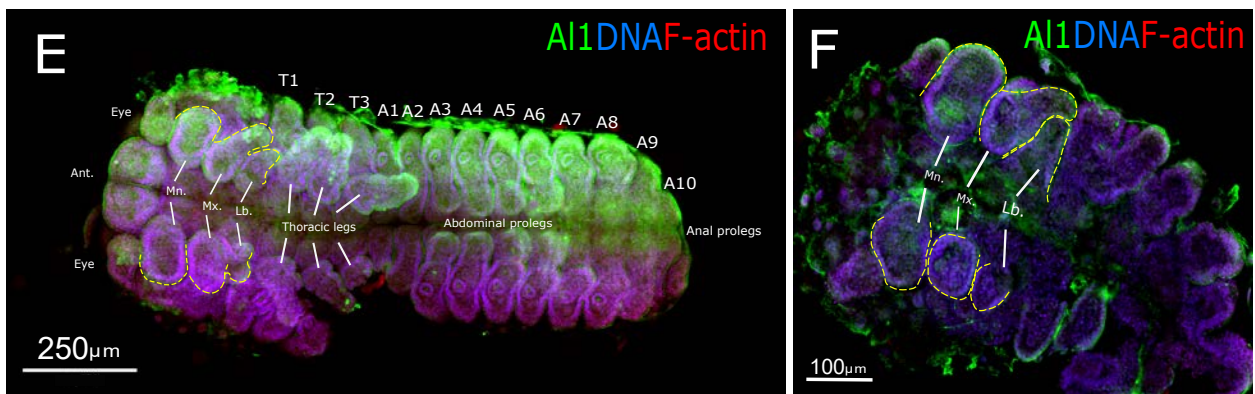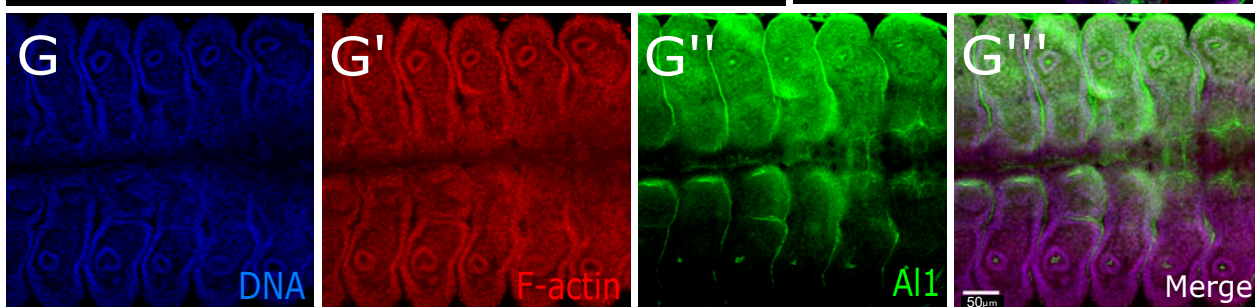



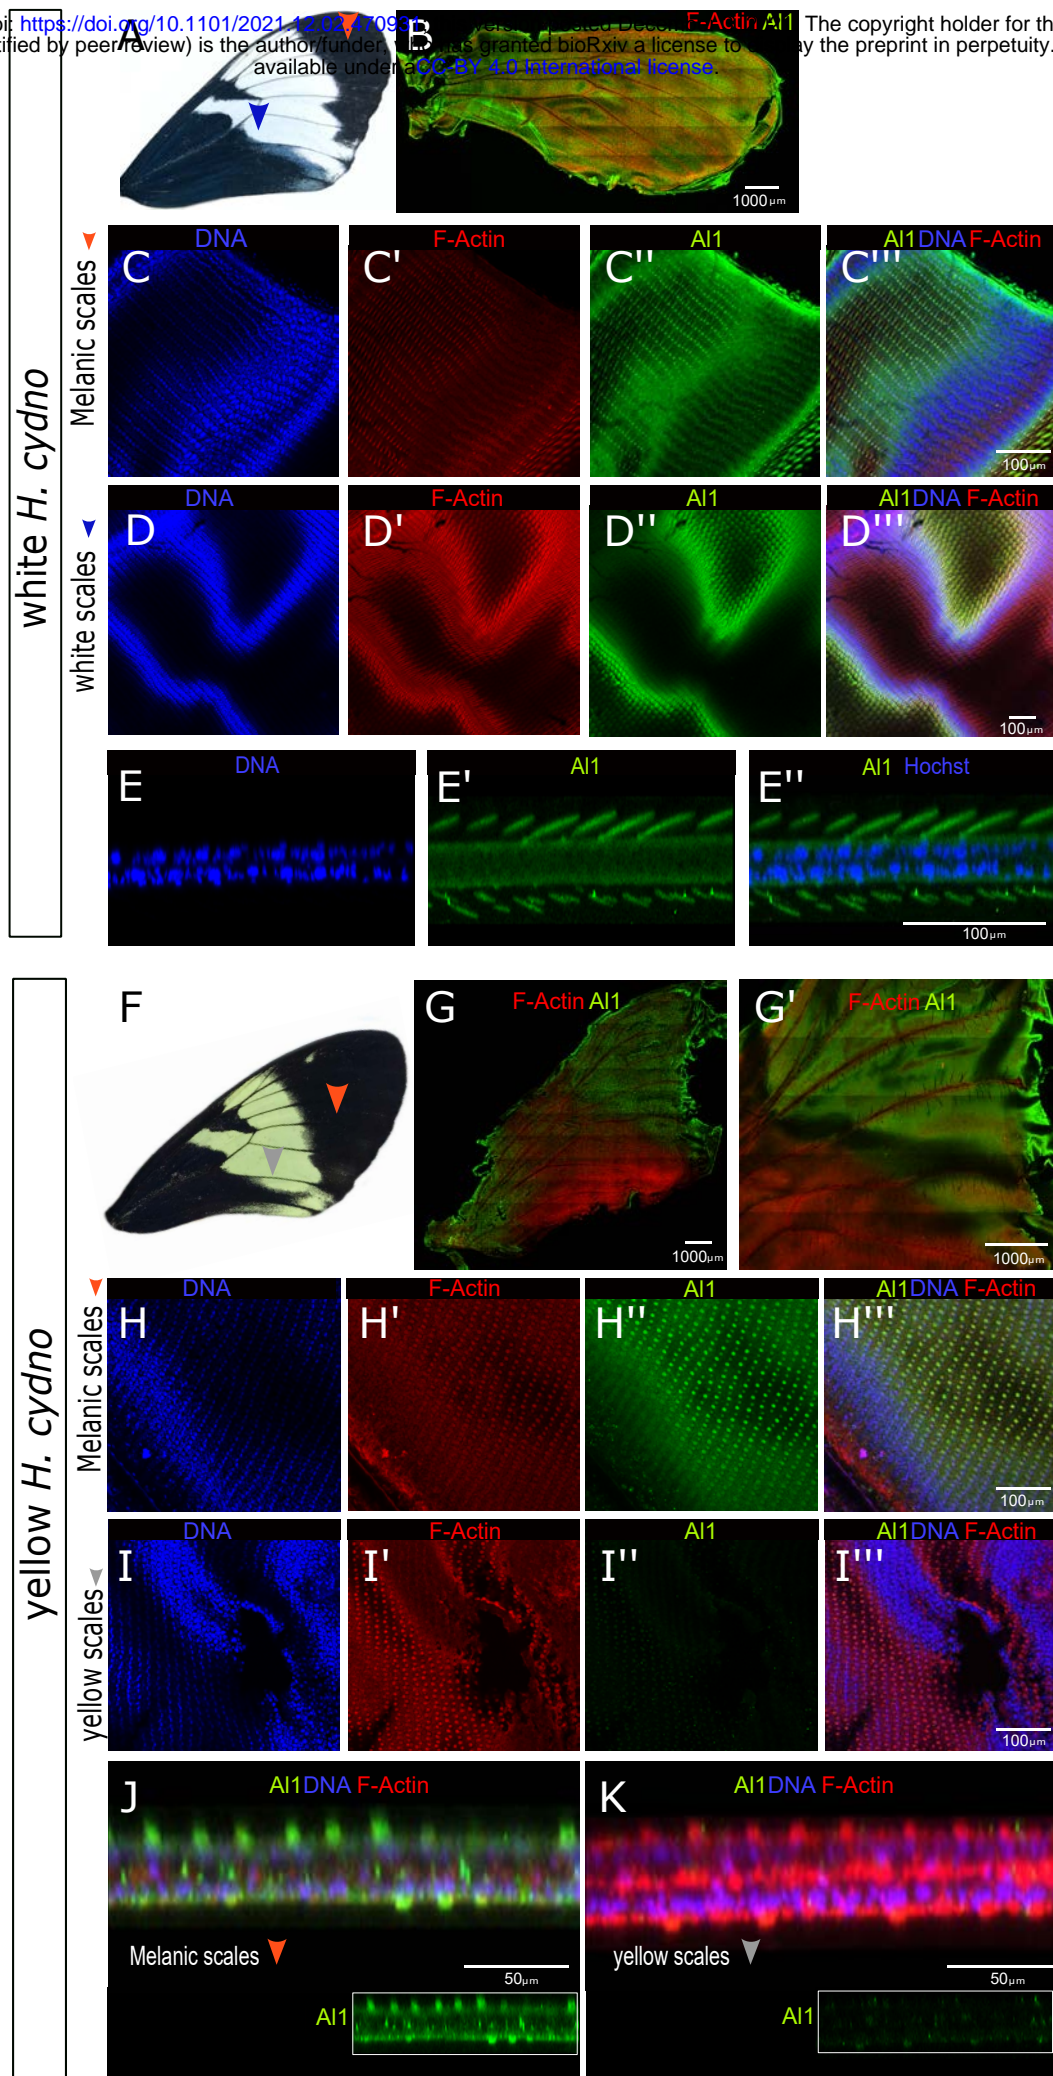

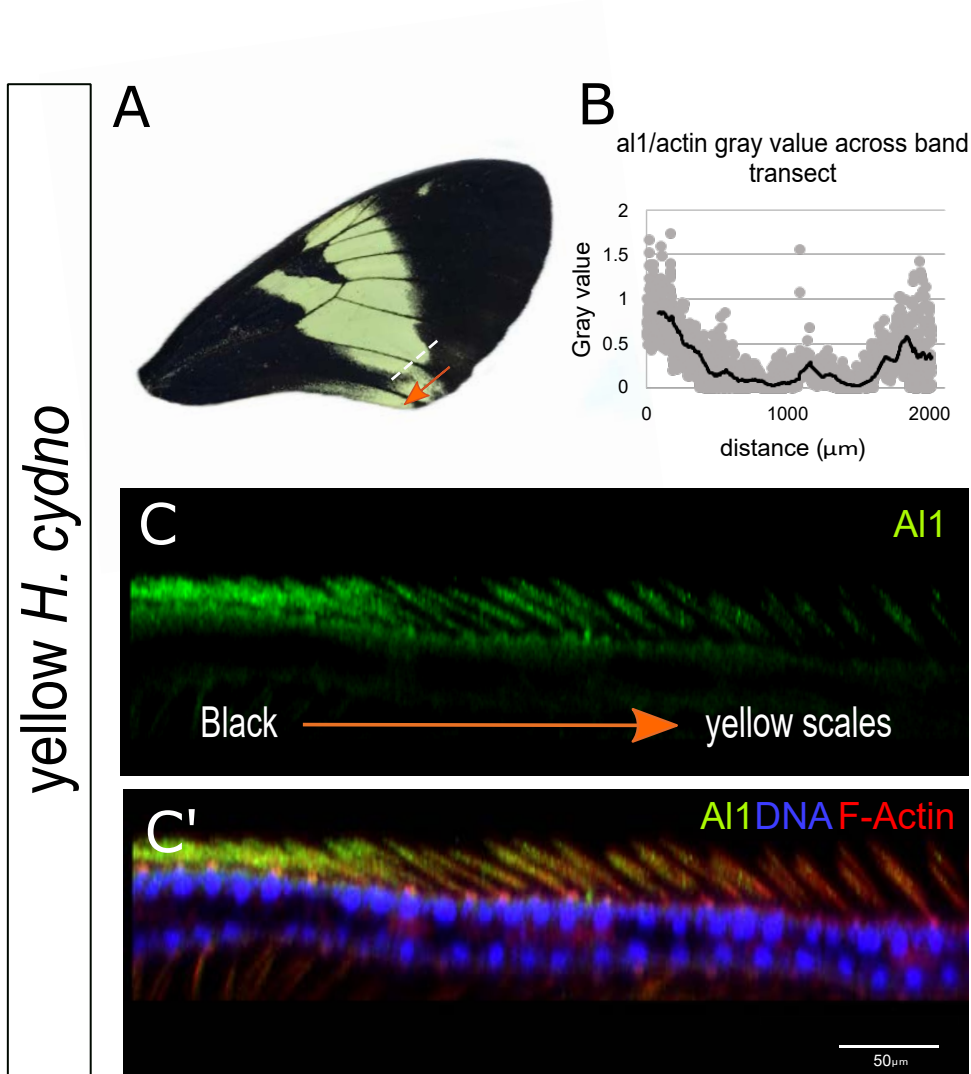

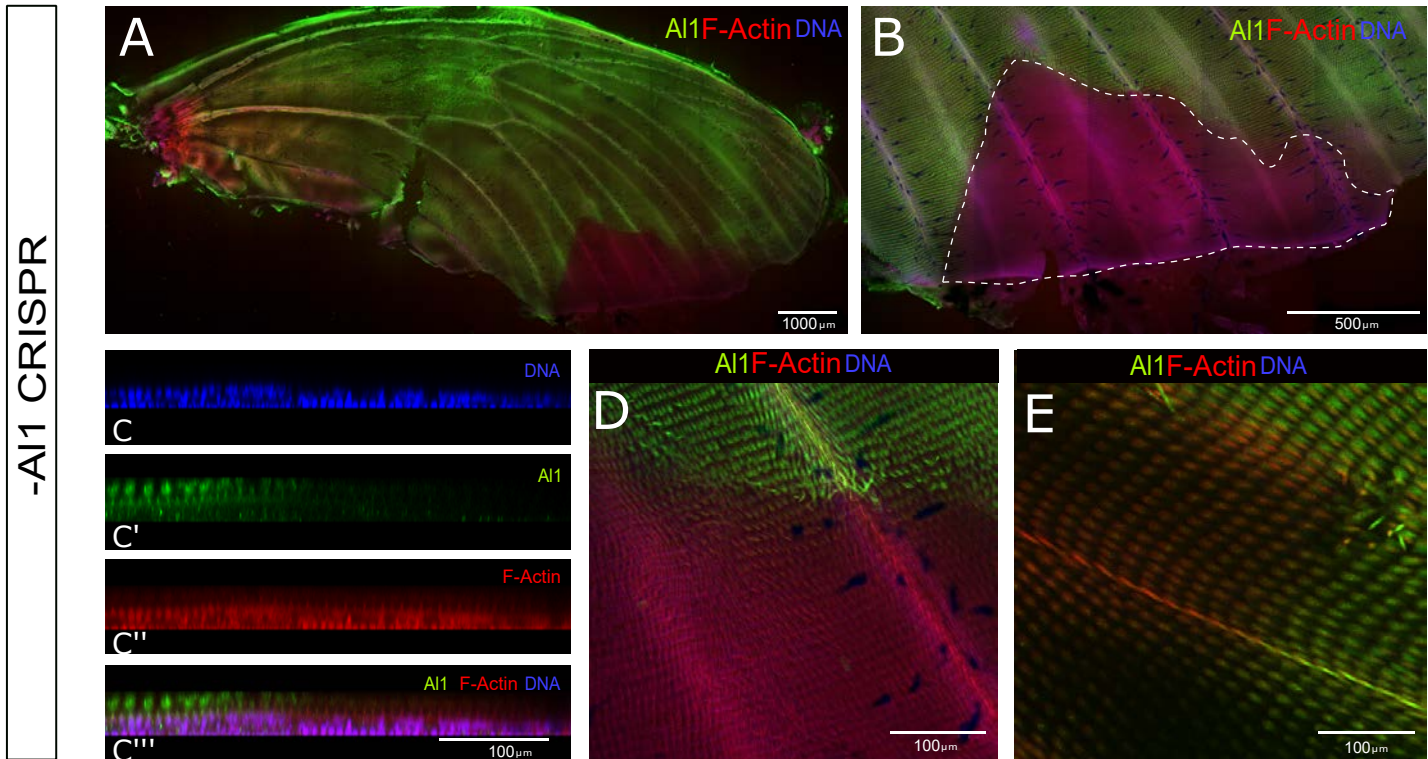

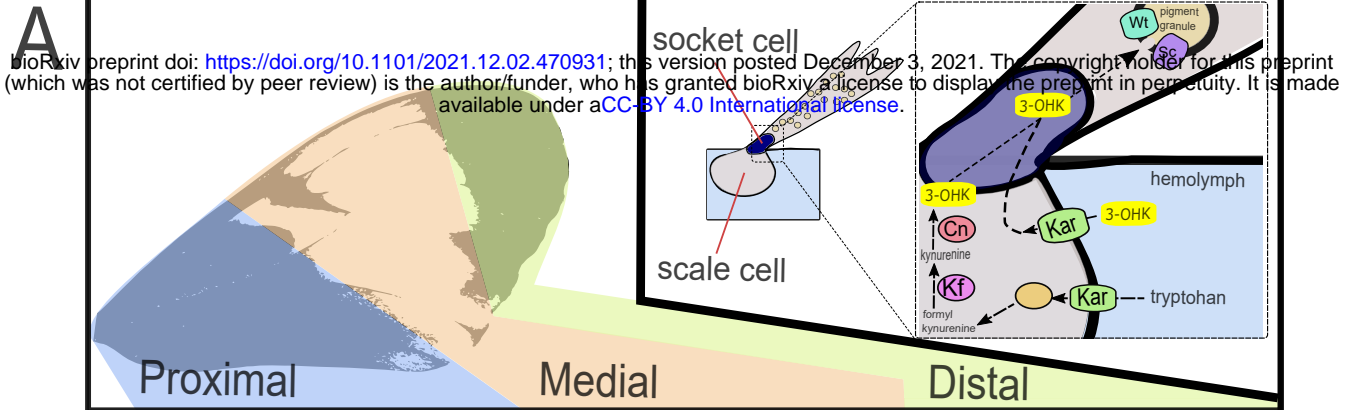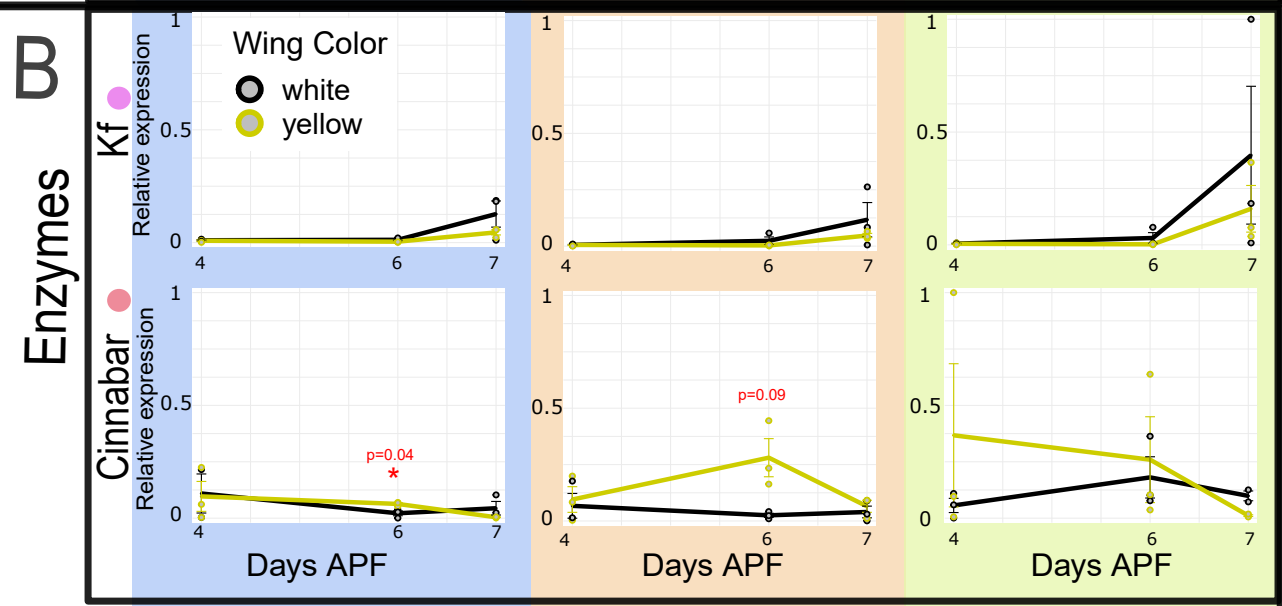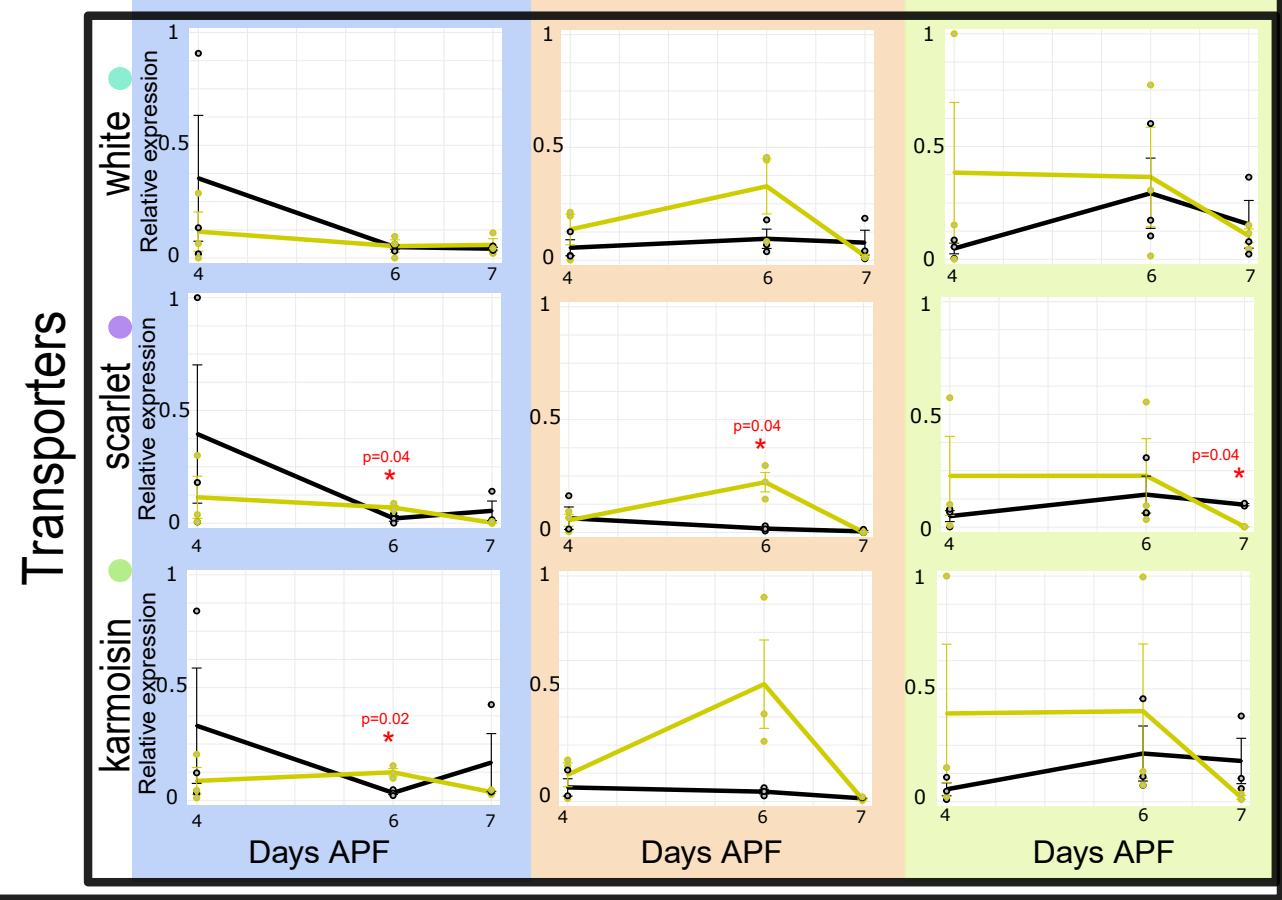

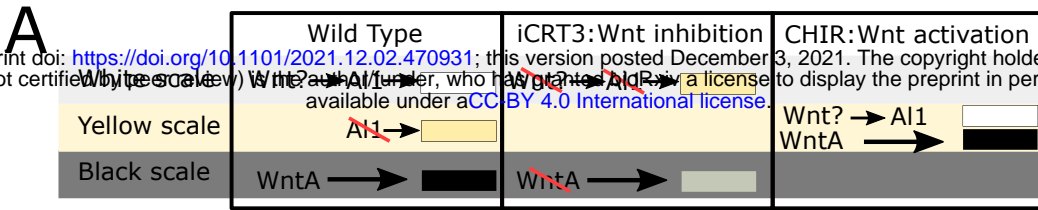

ICRT3 Injections in White *H. cydno*

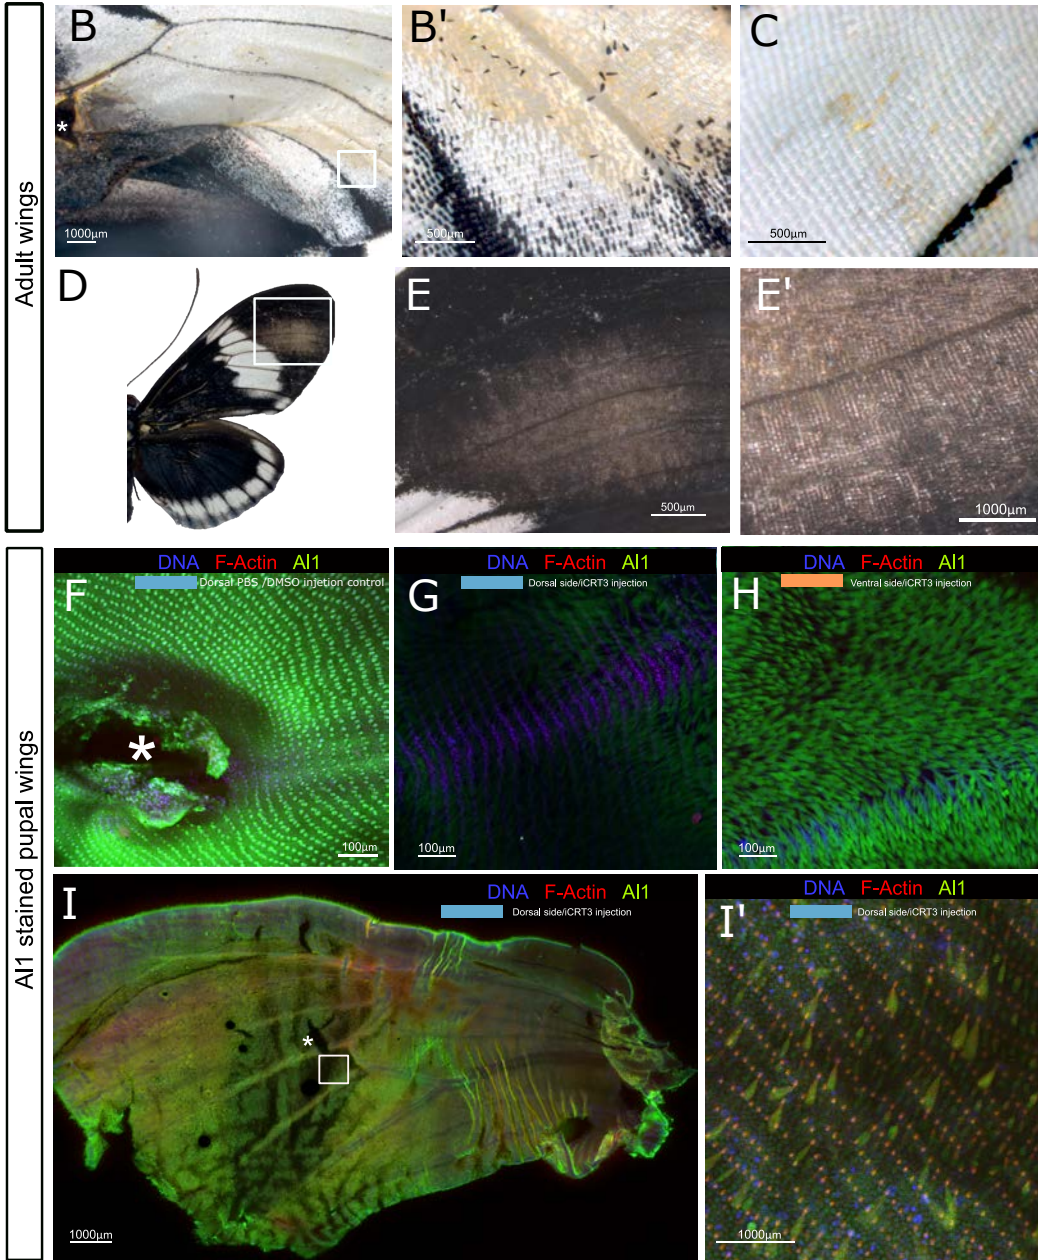

CHIR00921 Injections in yellow *H. cydno*

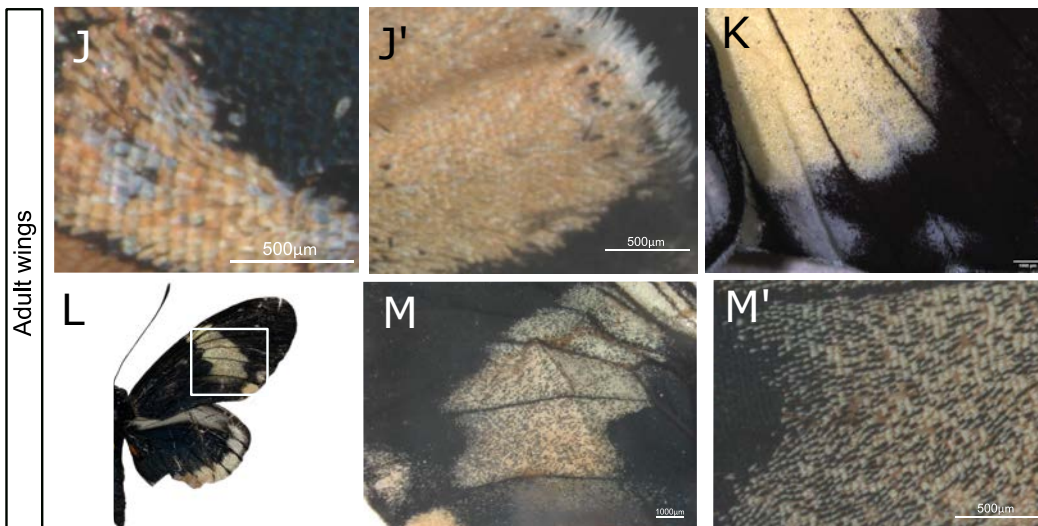

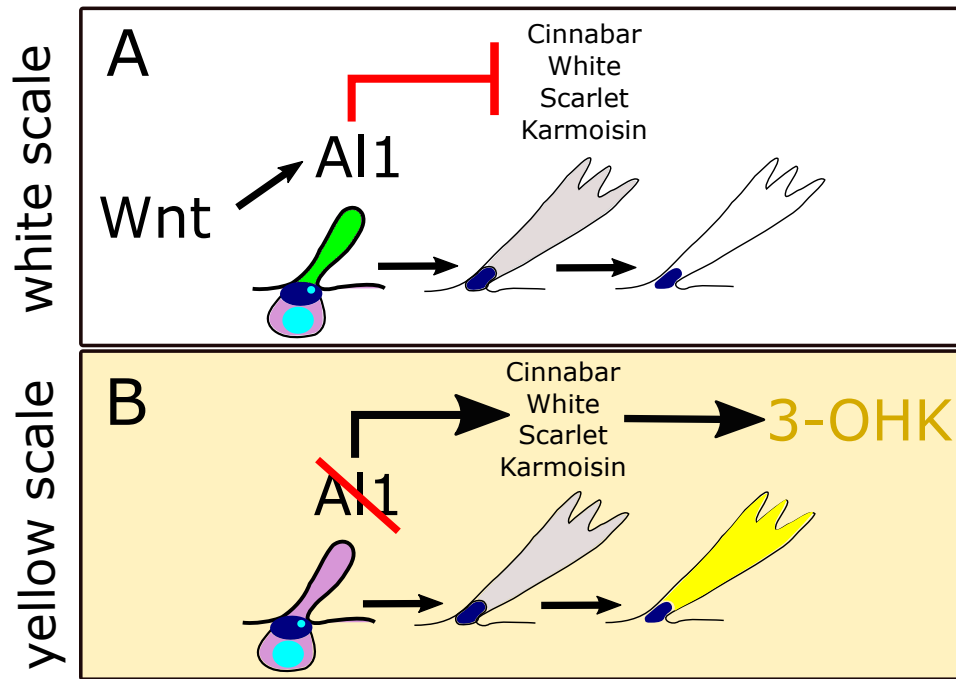

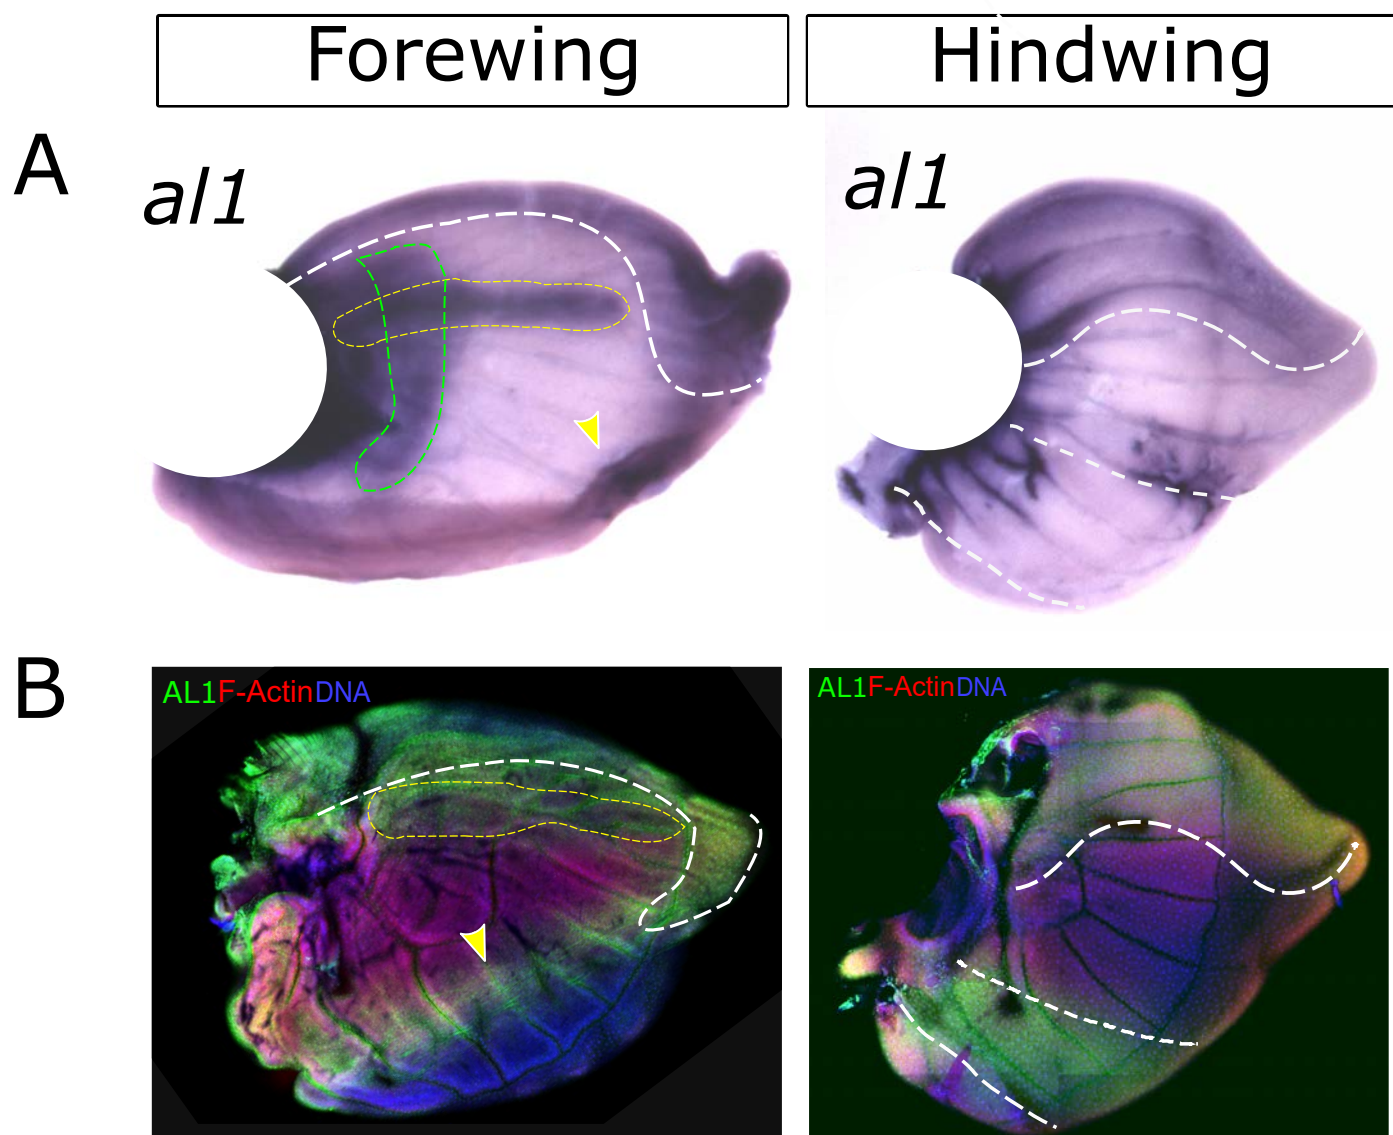

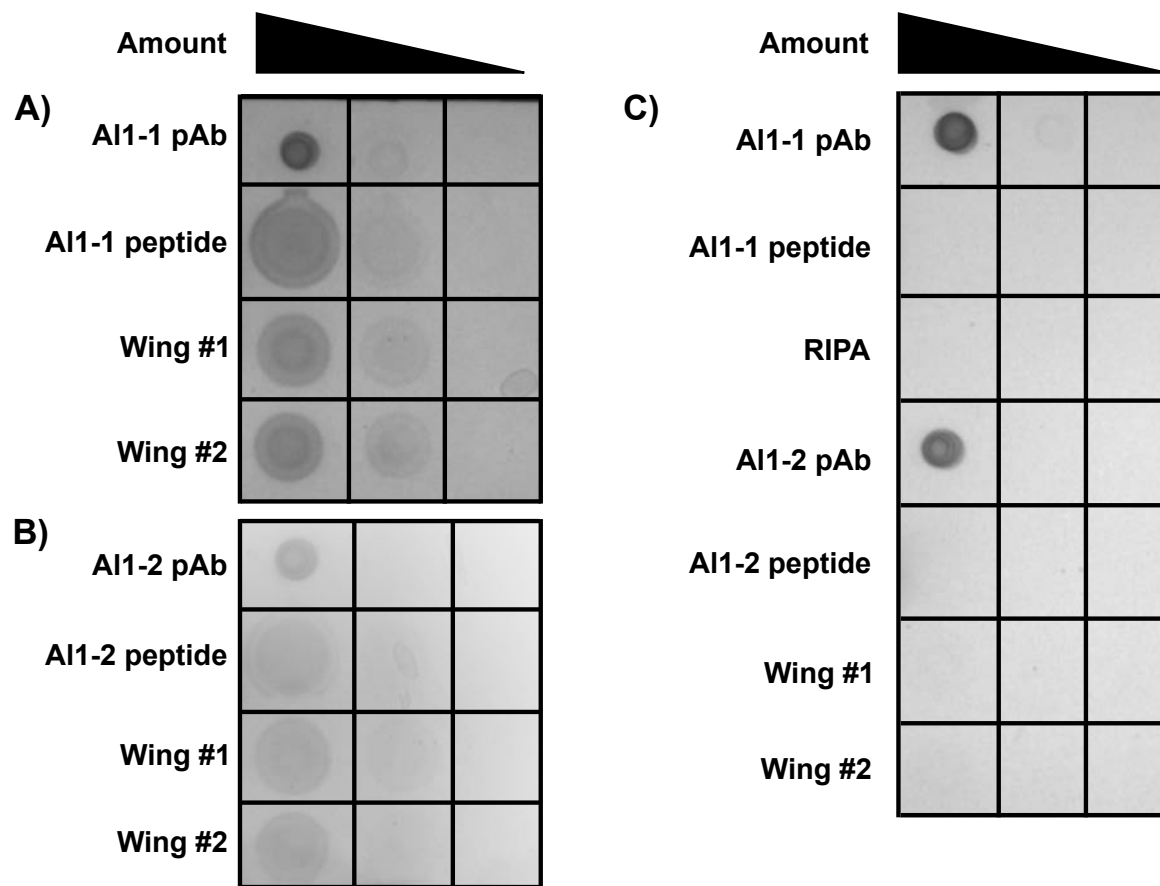



Days After Pupa Formation

2

3

4

white *H. cydno*

Dorsal

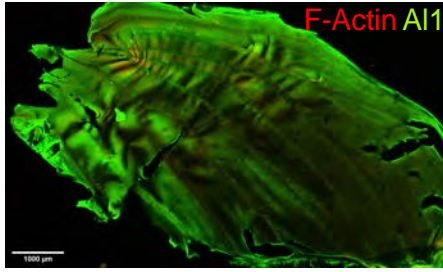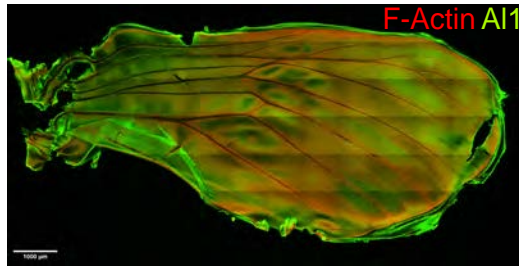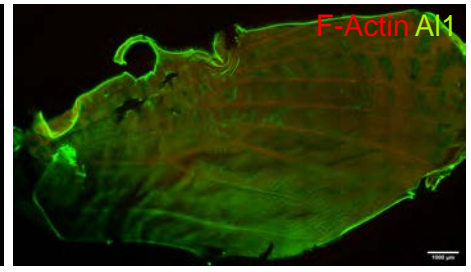

Ventral

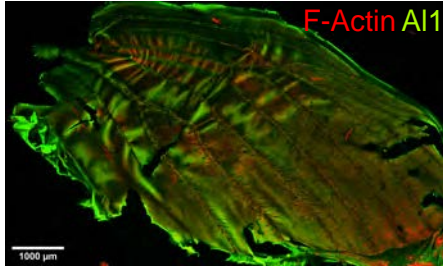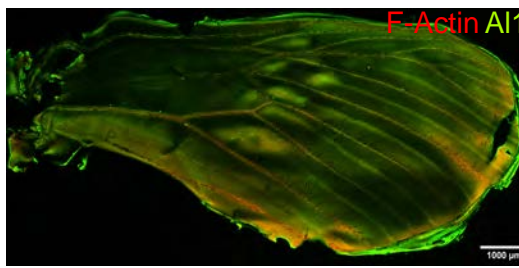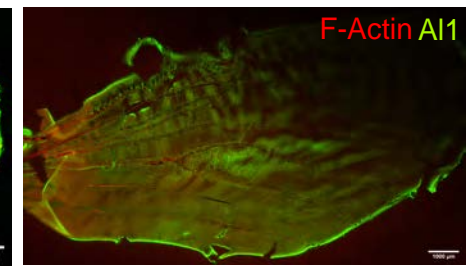

yellow *H. cydno*

Dorsal

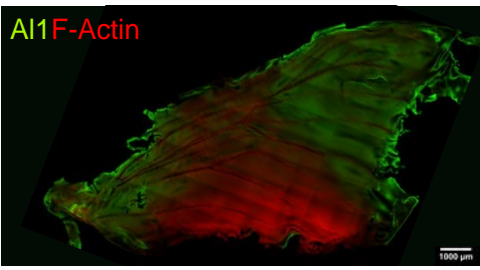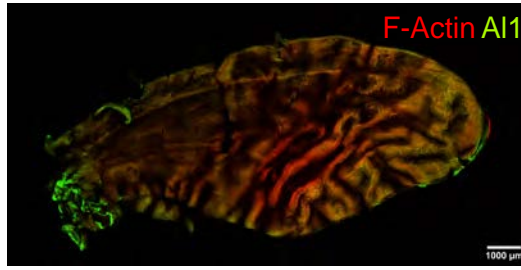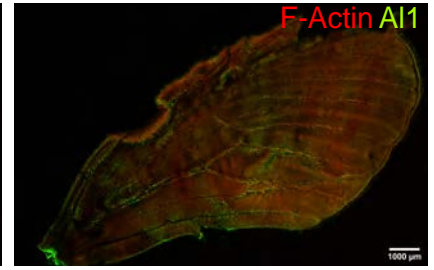

Ventral

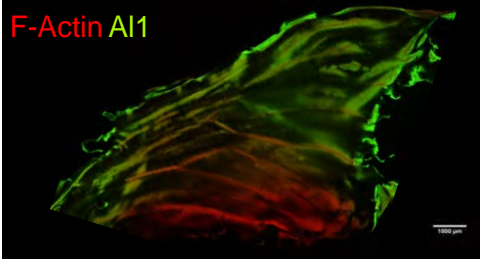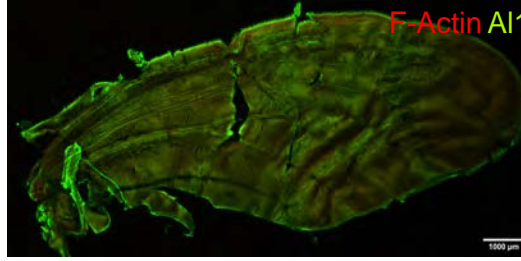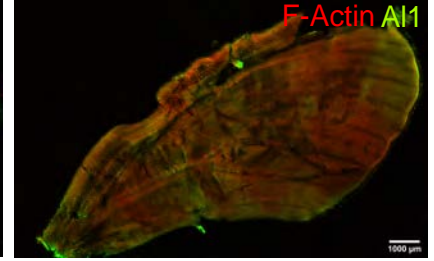

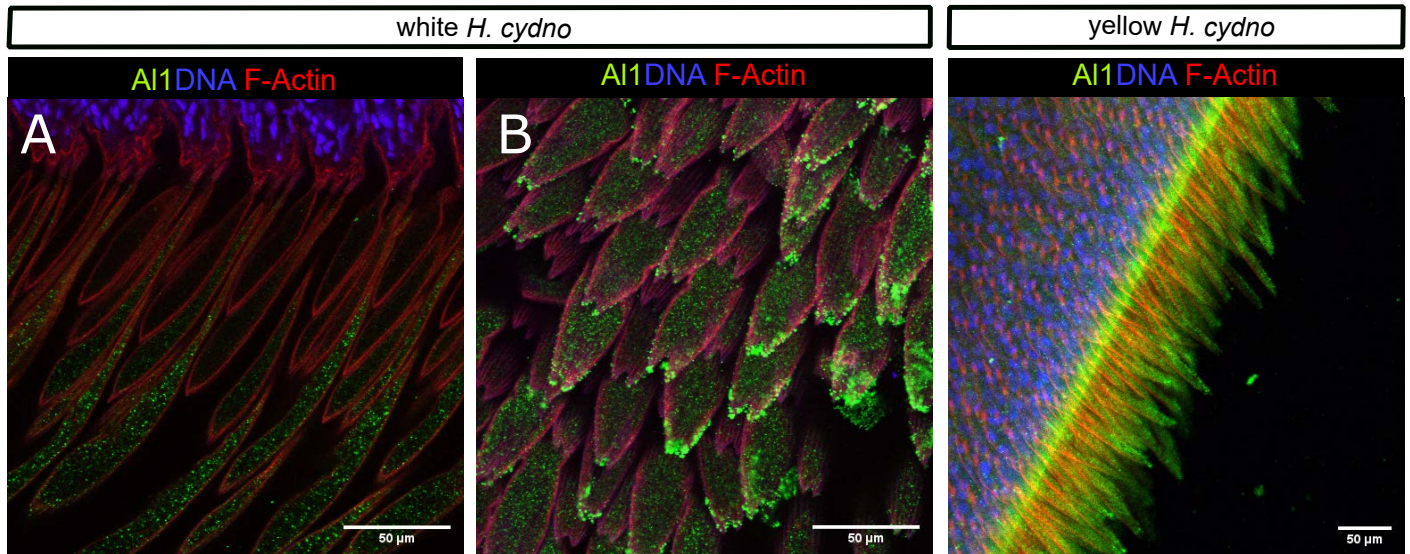

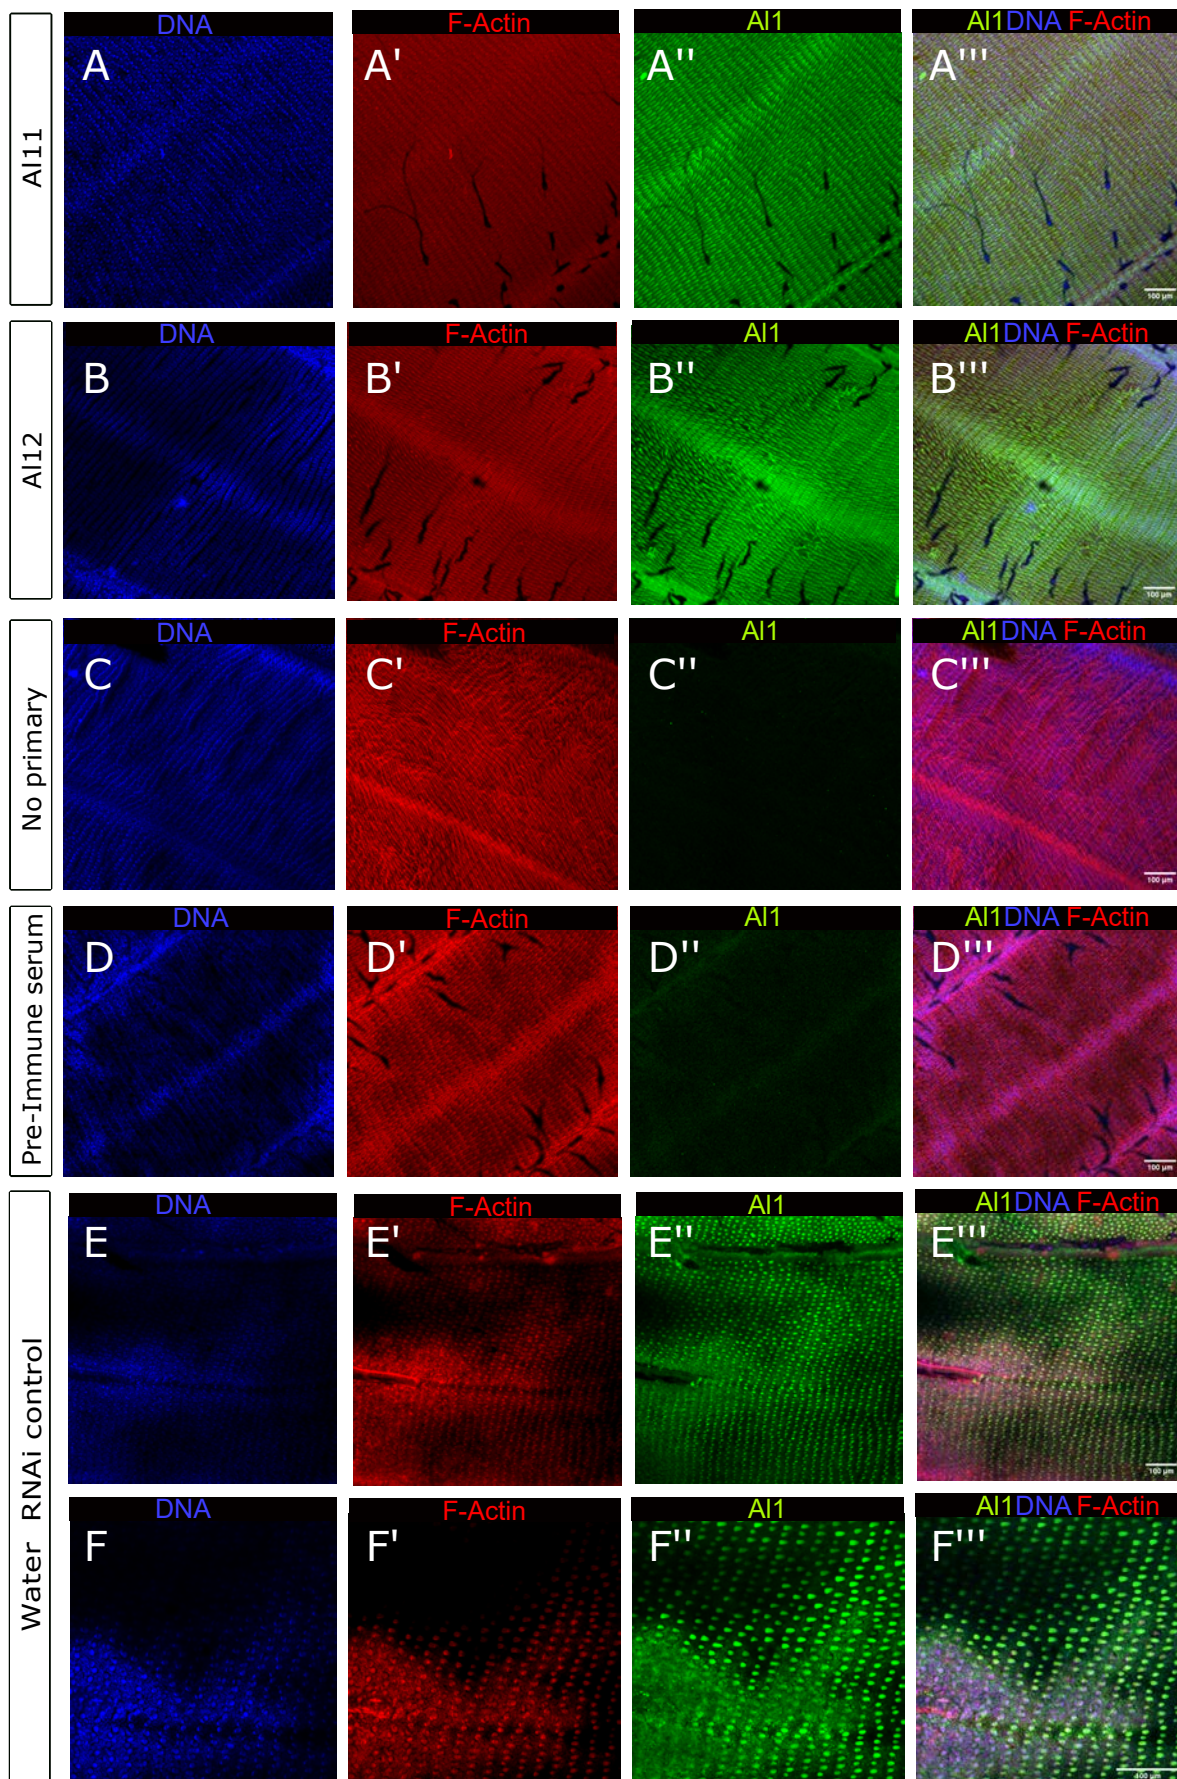

A

All white *H. cydno*

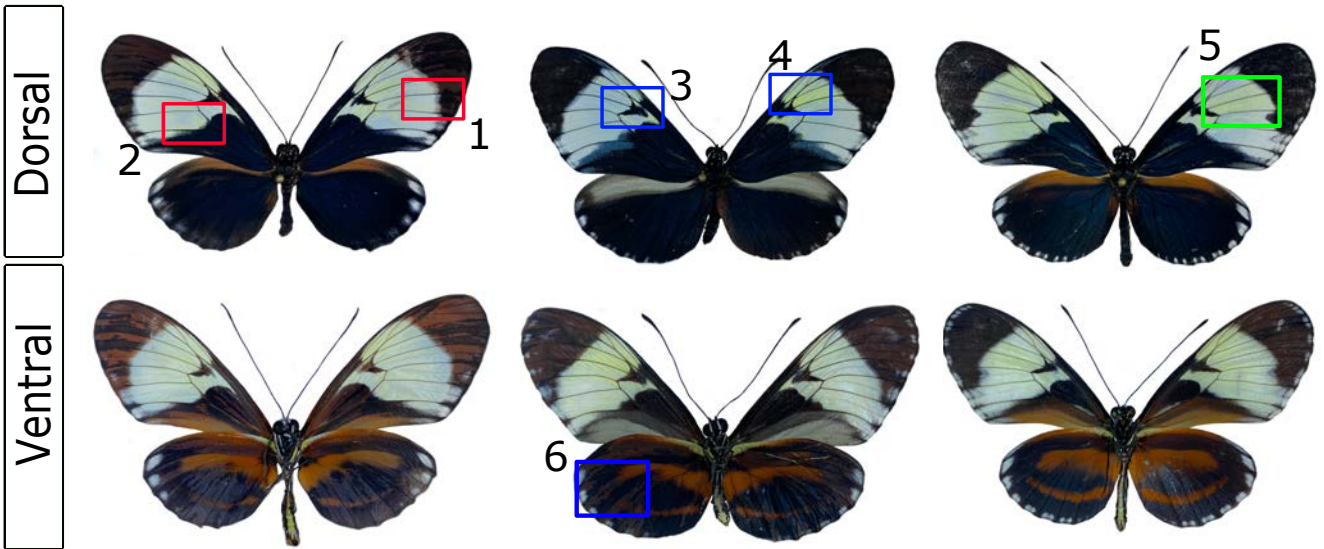

B

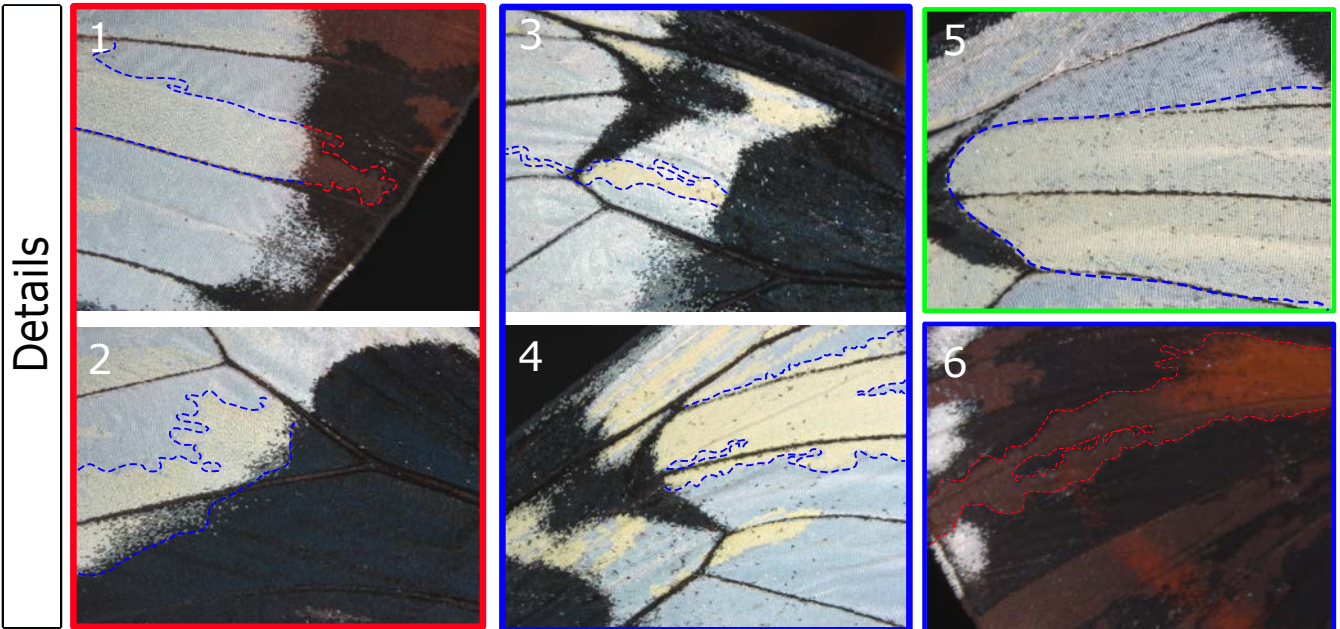

-AI1 CRISPR

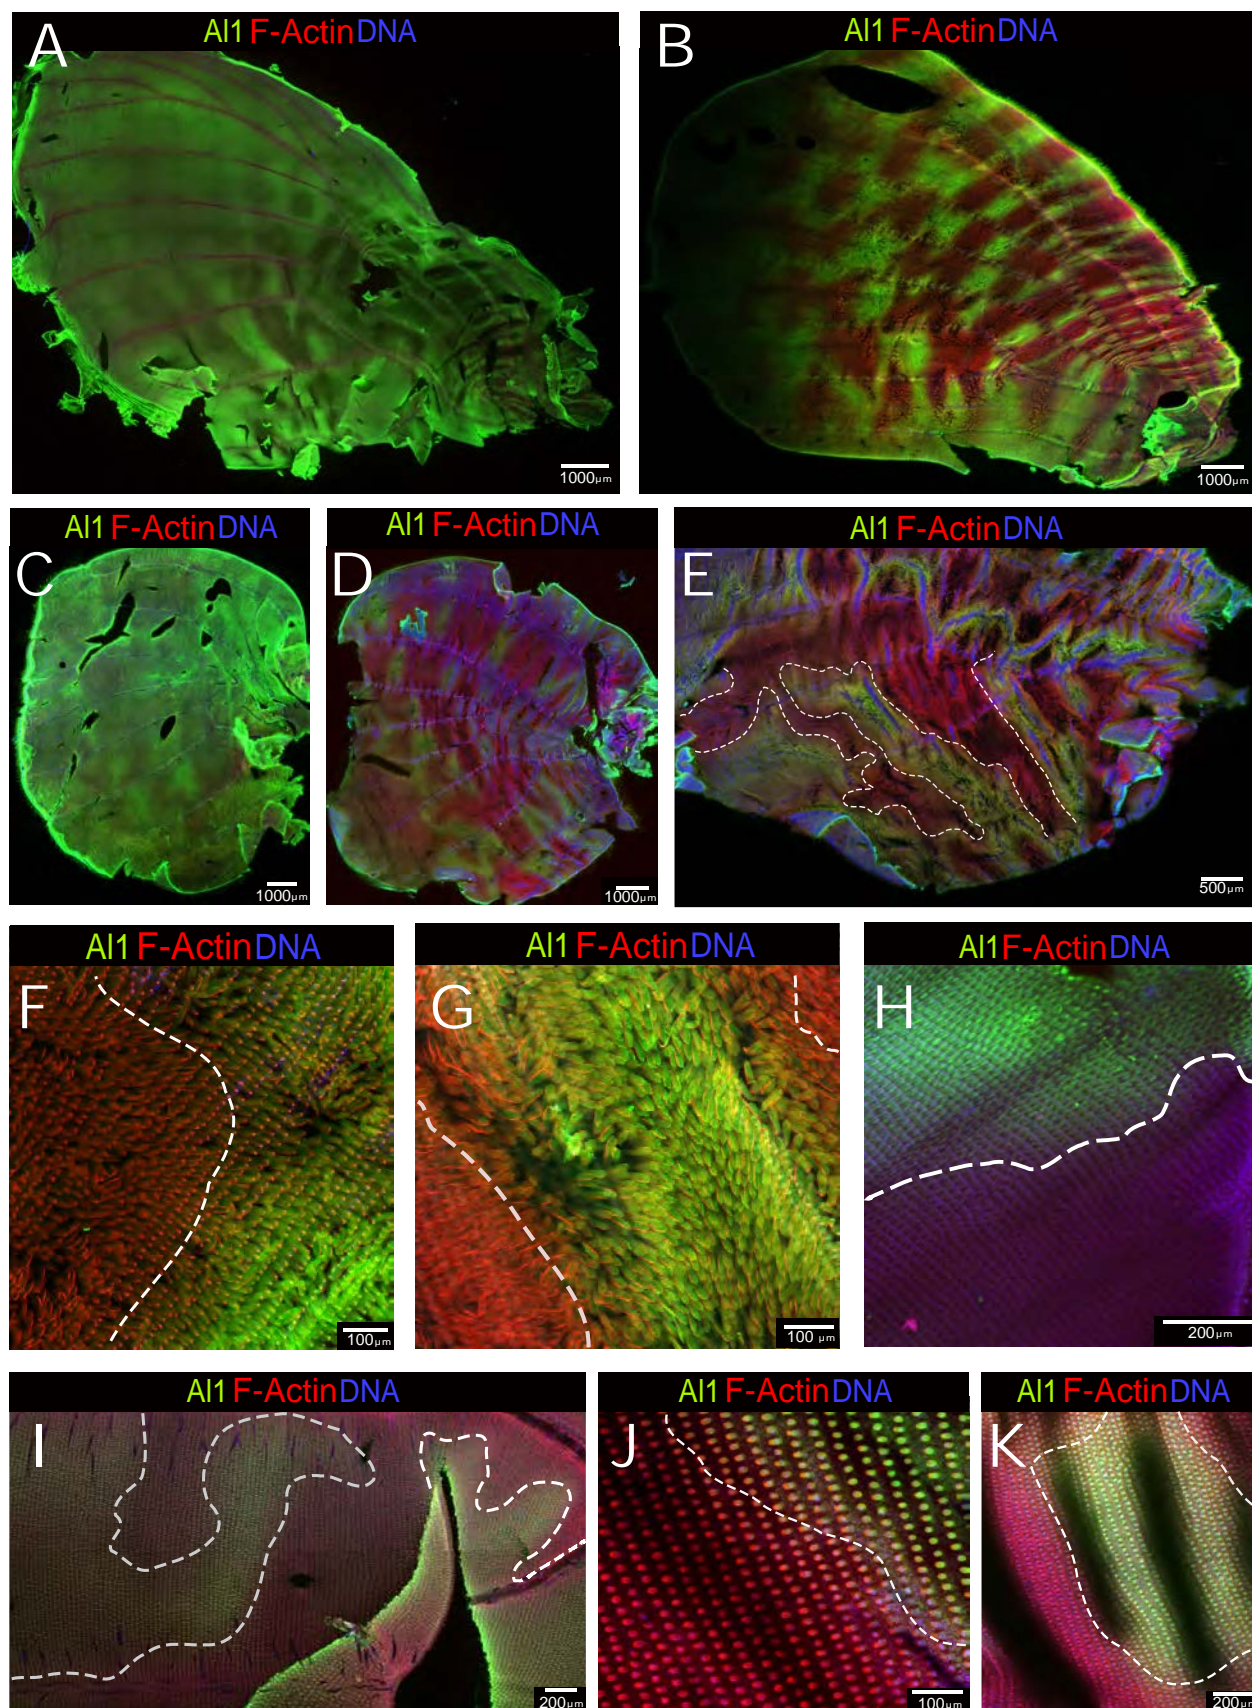

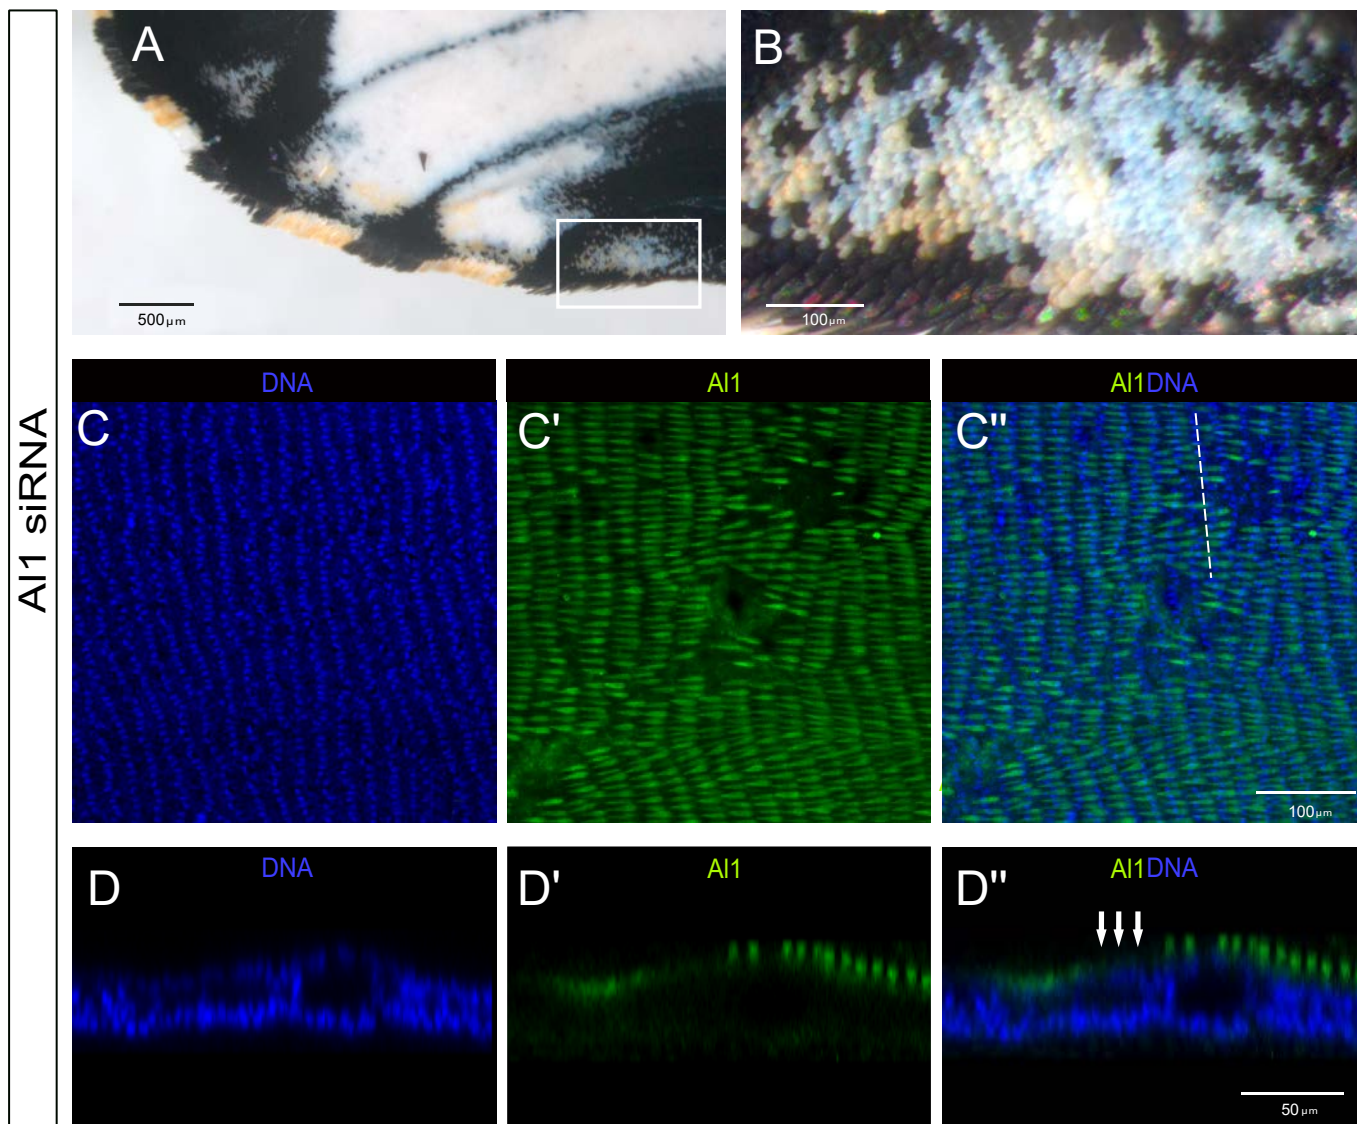

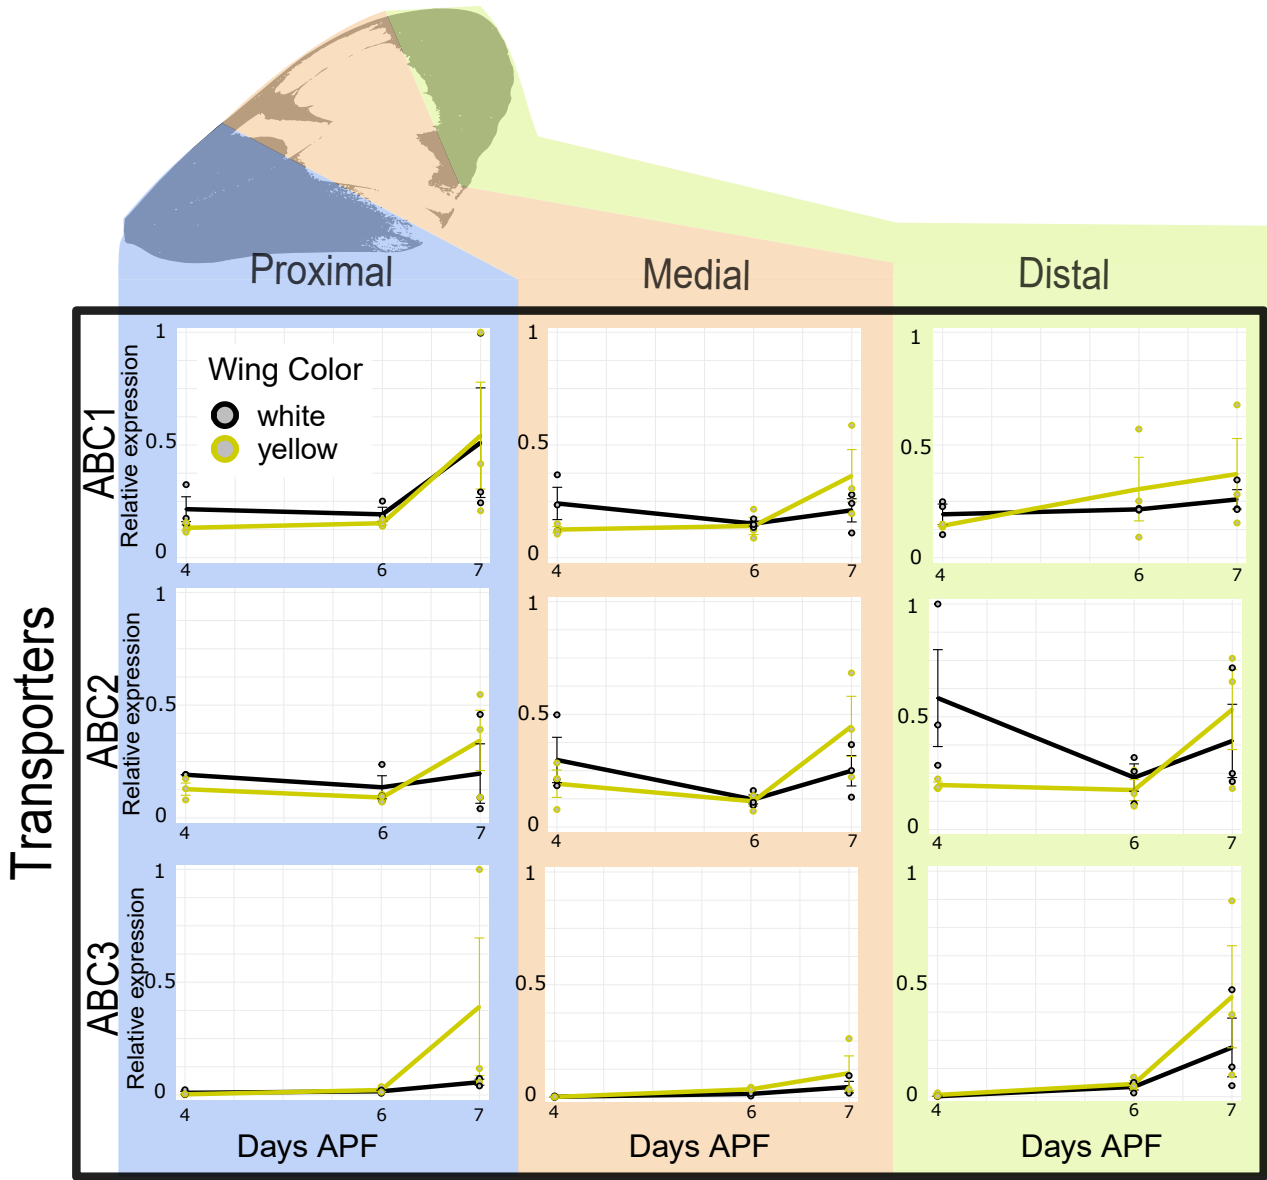

Source: https://www.biorxiv.org/content/10.1101/2021.12.02.470931v1.full.pdf
